# Supplementary material for: Compositional Changes of the High-Fat Diet-Induced Gut Microbiota upon Consumption of Common Pulses
Source: MDPI journal article supplement (doi:10.3390/nu13113992), 2021-11-09
Supplement: s1 [file s1]

## Supplemental Materials

**Table S1.** Pairwise comparison of bacterial composition at phylum level across the diet groups

| <b>Taxon 1</b>                 | <b>Taxon 2</b>                      | <b>Correlation</b> | <b>p-value</b> |
|--------------------------------|-------------------------------------|--------------------|----------------|
| <i>Adlercreutzia</i>           | <i>Bacteroides acidifaciens</i>     | -0.5019            | 0.0198         |
| <i>Adlercreutzia</i>           | <i>Mogibacteriaceae</i> (I)         | -0.4819            | 0.0099         |
| <i>Adlercreutzia</i>           | <i>Muribaculaceae</i>               | -0.4097            | 0.0297         |
| <i>Akkermansia muciniphila</i> | <i>Bacteroidales</i>                | 0.4769             | 0.0198         |
| <i>Akkermansia muciniphila</i> | <i>Bacteroides acidifaciens</i>     | 0.4489             | 0.0297         |
| <i>Akkermansia muciniphila</i> | F16                                 | -0.5229            | 0.0099         |
| <i>Akkermansia muciniphila</i> | rc4 4                               | 0.4385             | 0.0198         |
| <i>Allobaculum</i>             | <i>Anaerotruncus</i>                | -0.5972            | 0.0099         |
| <i>Allobaculum</i>             | <i>Bacteroidales</i>                | 0.4989             | 0.0099         |
| <i>Allobaculum</i>             | <i>Bacteroides</i>                  | -0.6901            | 0.0099         |
| <i>Allobaculum</i>             | <i>Bacteroides acidifaciens</i>     | 0.6969             | 0.0099         |
| <i>Allobaculum</i>             | <i>Butyricicoccus pullicaecorum</i> | 0.6164             | 0.0099         |
| <i>Allobaculum</i>             | <i>Christensenellaceae</i>          | -0.6602            | 0.0099         |
| <i>Allobaculum</i>             | <i>Clostridiales</i> (II)           | -0.6417            | 0.0198         |
| <i>Allobaculum</i>             | <i>Clostridium methylpentosum</i>   | -0.665             | 0.0099         |
| <i>Allobaculum</i>             | <i>Coproccoccus</i>                 | -0.6128            | 0.0099         |
| <i>Allobaculum</i>             | <i>Desulfovibrionaceae</i>          | -0.5851            | 0.0099         |
| <i>Allobaculum</i>             | <i>Lactobacillus</i>                | 0.5286             | 0.0198         |
| <i>Allobaculum</i>             | <i>Mogibacteriaceae</i> (II)        | 0.4387             | 0.0198         |
| <i>Allobaculum</i>             | <i>Mucispirillum schaedleri</i>     | -0.6859            | 0.0099         |
| <i>Allobaculum</i>             | <i>Muribaculaceae</i>               | 0.6225             | 0.0198         |
| <i>Allobaculum</i>             | <i>Oscillospira</i>                 | -0.8149            | 0.0099         |
| <i>Allobaculum</i>             | <i>Peptococcaceae</i>               | -0.6891            | 0.0099         |
| <i>Allobaculum</i>             | rc4 4                               | 0.6133             | 0.0099         |
| <i>Allobaculum</i>             | RF32                                | 0.5875             | 0.0099         |
| <i>Allobaculum</i>             | RF39                                | 0.4504             | 0.0099         |
| <i>Allobaculum</i>             | <i>Rikenellaceae</i>                | 0.7471             | 0.0099         |
| <i>Allobaculum</i>             | <i>Ruminococcaceae</i> (I)          | -0.7728            | 0.0198         |
| <i>Allobaculum</i>             | <i>Ruminococcaceae</i> (II)         | -0.6007            | 0.0297         |
| <i>Allobaculum</i>             | <i>Ruminococcus gnavus</i>          | -0.7664            | 0.0099         |
| <i>Allobaculum</i>             | <i>Sutterella</i>                   | 0.7814             | 0.0099         |
| <i>Anaerotruncus</i>           | <i>Allobaculum</i>                  | -0.5972            | 0.0099         |
| <i>Anaerotruncus</i>           | <i>Bacteroides</i>                  | 0.6121             | 0.0099         |

**Table S1.** Pairwise comparison of bacterial composition at phylum level across the diet groups

| <b>Taxon 1</b>       | <b>Taxon 2</b>                      | <b>Correlation</b> | <b>p-value</b> |
|----------------------|-------------------------------------|--------------------|----------------|
| <i>Anaerotruncus</i> | <i>Bacteroides acidifaciens</i>     | -0.4836            | 0.0396         |
| <i>Anaerotruncus</i> | <i>Bilophila</i>                    | 0.7033             | 0.0099         |
| <i>Anaerotruncus</i> | <i>Christensenellaceae</i>          | 0.695              | 0.0099         |
| <i>Anaerotruncus</i> | <i>Clostridiales (II)</i>           | 0.6543             | 0.0297         |
| <i>Anaerotruncus</i> | <i>Clostridium methylpentosum</i>   | 0.6913             | 0.0099         |
| <i>Anaerotruncus</i> | <i>Lactococcus</i>                  | 0.4505             | 0.0198         |
| <i>Anaerotruncus</i> | <i>Mucispirillum schaedleri</i>     | 0.6487             | 0.0099         |
| <i>Anaerotruncus</i> | <i>Oscillospira</i>                 | 0.7022             | 0.0099         |
| <i>Anaerotruncus</i> | <i>Parabacteroides gordonii</i>     | 0.5829             | 0.0198         |
| <i>Anaerotruncus</i> | <i>Peptococcaceae</i>               | 0.7029             | 0.0099         |
| <i>Anaerotruncus</i> | <i>rc4 4</i>                        | -0.4664            | 0.0099         |
| <i>Anaerotruncus</i> | <i>RF32</i>                         | -0.5394            | 0.0099         |
| <i>Anaerotruncus</i> | <i>Rikenellaceae</i>                | -0.5739            | 0.0396         |
| <i>Anaerotruncus</i> | <i>Ruminococcaceae (I)</i>          | 0.5555             | 0.0396         |
| <i>Anaerotruncus</i> | <i>Ruminococcaceae (II)</i>         | 0.6048             | 0.0297         |
| <i>Anaerotruncus</i> | <i>Ruminococcus gnavus</i>          | 0.6821             | 0.0099         |
| <i>Anaerotruncus</i> | <i>Streptococcus</i>                | 0.5456             | 0.0099         |
| <i>Anaerotruncus</i> | <i>Sutterella</i>                   | -0.622             | 0.0099         |
| <i>Bacteroidales</i> | <i>Akkermansia muciniphila</i>      | 0.4769             | 0.0198         |
| <i>Bacteroidales</i> | <i>Allobaculum</i>                  | 0.4989             | 0.0099         |
| <i>Bacteroidales</i> | <i>Bacteroides acidifaciens</i>     | 0.6714             | 0.0099         |
| <i>Bacteroidales</i> | <i>Butyricicoccus pullicaecorum</i> | 0.5549             | 0.0099         |
| <i>Bacteroidales</i> | <i>Clostridiales (II)</i>           | -0.6171            | 0.0396         |
| <i>Bacteroidales</i> | <i>Lactococcus</i>                  | -0.4184            | 0.0099         |
| <i>Bacteroidales</i> | <i>Mucispirillum schaedleri</i>     | -0.5242            | 0.0099         |
| <i>Bacteroidales</i> | <i>Muribaculaceae</i>               | 0.7358             | 0.0099         |
| <i>Bacteroidales</i> | <i>rc4 4</i>                        | 0.472              | 0.0099         |
| <i>Bacteroidales</i> | <i>RF32</i>                         | 0.5945             | 0.0099         |
| <i>Bacteroidales</i> | <i>Rikenellaceae</i>                | 0.5491             | 0.0099         |
| <i>Bacteroidales</i> | <i>Sutterella</i>                   | 0.6197             | 0.0099         |
| <i>Bacteroides</i>   | <i>Allobaculum</i>                  | -0.6901            | 0.0099         |
| <i>Bacteroides</i>   | <i>Anaerotruncus</i>                | 0.6121             | 0.0099         |
| <i>Bacteroides</i>   | <i>Bacteroides acidifaciens</i>     | -0.7297            | 0.0099         |
| <i>Bacteroides</i>   | <i>Bilophila</i>                    | 0.5469             | 0.0396         |

**Table S1.** Pairwise comparison of bacterial composition at phylum level across the diet groups

| <b>Taxon 1</b>                  | <b>Taxon 2</b>                      | <b>Correlation</b> | <b>p-value</b> |
|---------------------------------|-------------------------------------|--------------------|----------------|
| <i>Bacteroides</i>              | <i>Butyricicoccus pullicaecorum</i> | -0.5548            | 0.0099         |
| <i>Bacteroides</i>              | <i>Christensenellaceae</i>          | 0.6673             | 0.0099         |
| <i>Bacteroides</i>              | <i>Clostridium methylpentosum</i>   | 0.5067             | 0.0099         |
| <i>Bacteroides</i>              | <i>Lactococcus</i>                  | 0.4501             | 0.0297         |
| <i>Bacteroides</i>              | <i>Mogibacteriaceae</i> (II)        | -0.4732            | 0.0396         |
| <i>Bacteroides</i>              | <i>Mucispirillum schaedleri</i>     | 0.626              | 0.0099         |
| <i>Bacteroides</i>              | <i>Oscillospira</i>                 | 0.7179             | 0.0297         |
| <i>Bacteroides</i>              | <i>Peptococcaceae</i>               | 0.7086             | 0.0297         |
| <i>Bacteroides</i>              | <i>rc4 4</i>                        | -0.7371            | 0.0198         |
| <i>Bacteroides</i>              | <i>RF32</i>                         | -0.5772            | 0.0198         |
| <i>Bacteroides</i>              | <i>Rikenellaceae</i>                | -0.6628            | 0.0099         |
| <i>Bacteroides</i>              | <i>Ruminococcus gnavus</i>          | 0.737              | 0.0099         |
| <i>Bacteroides</i>              | <i>Streptococcus</i>                | 0.4986             | 0.0198         |
| <i>Bacteroides</i>              | <i>Sutterella</i>                   | -0.7186            | 0.0099         |
| <i>Bacteroides acidifaciens</i> | <i>Adlercreutzia</i>                | -0.5019            | 0.0198         |
| <i>Bacteroides acidifaciens</i> | <i>Akkermansia muciniphila</i>      | 0.4489             | 0.0297         |
| <i>Bacteroides acidifaciens</i> | <i>Allobaculum</i>                  | 0.6969             | 0.0099         |
| <i>Bacteroides acidifaciens</i> | <i>Anaerotruncus</i>                | -0.4836            | 0.0396         |
| <i>Bacteroides acidifaciens</i> | <i>Bacteroidales</i>                | 0.6714             | 0.0099         |
| <i>Bacteroides acidifaciens</i> | <i>Bacteroides</i>                  | -0.7297            | 0.0099         |
| <i>Bacteroides acidifaciens</i> | <i>Bilophila</i>                    | -0.474             | 0.0396         |
| <i>Bacteroides acidifaciens</i> | <i>Butyricicoccus pullicaecorum</i> | 0.5836             | 0.0099         |
| <i>Bacteroides acidifaciens</i> | <i>Christensenellaceae</i>          | -0.4859            | 0.0099         |
| <i>Bacteroides acidifaciens</i> | <i>Clostridiales</i> (I)            | -0.5447            | 0.0495         |
| <i>Bacteroides acidifaciens</i> | <i>Clostridiales</i> (II)           | 1                  | 0.0297         |
| <i>Bacteroides acidifaciens</i> | <i>Clostridium methylpentosum</i>   | -0.6347            | 0.0099         |
| <i>Bacteroides acidifaciens</i> | <i>Desulfovibrionaceae</i>          | -0.4005            | 0.0099         |
| <i>Bacteroides acidifaciens</i> | <i>F16</i>                          | -0.5527            | 0.0099         |
| <i>Bacteroides acidifaciens</i> | <i>Lachnospiraceae</i> (I)          | -0.6692            | 0.0297         |
| <i>Bacteroides acidifaciens</i> | <i>Lactococcus</i>                  | -0.6788            | 0.0099         |
| <i>Bacteroides acidifaciens</i> | <i>Mogibacteriaceae</i> (II)        | 0.7584             | 0.0099         |
| <i>Bacteroides acidifaciens</i> | <i>Mucispirillum schaedleri</i>     | -0.6543            | 0.0099         |
| <i>Bacteroides acidifaciens</i> | <i>Muribaculaceae</i>               | 0.7002             | 0.0297         |
| <i>Bacteroides acidifaciens</i> | <i>Oscillospira</i>                 | -0.6911            | 0.0297         |

**Table S1.** Pairwise comparison of bacterial composition at phylum level across the diet groups

| <b>Taxon 1</b>                      | <b>Taxon 2</b>                    | <b>Correlation</b> | <b>p-value</b> |
|-------------------------------------|-----------------------------------|--------------------|----------------|
| <i>Bacteroides acidifaciens</i>     | <i>Peptococcaceae</i>             | -0.7333            | 0.0099         |
| <i>Bacteroides acidifaciens</i>     | <i>rc4 4</i>                      | 0.802              | 0.0099         |
| <i>Bacteroides acidifaciens</i>     | <i>RF32</i>                       | 0.9205             | 0.0099         |
| <i>Bacteroides acidifaciens</i>     | <i>Rikenellaceae</i>              | 0.8036             | 0.0099         |
| <i>Bacteroides acidifaciens</i>     | <i>Ruminococcus gnavus</i>        | -0.7898            | 0.0198         |
| <i>Bacteroides acidifaciens</i>     | <i>Streptococcus</i>              | -0.5349            | 0.0099         |
| <i>Bacteroides acidifaciens</i>     | <i>Sutterella</i>                 | 0.8574             | 0.0099         |
| <i>Bilophila</i>                    | <i>Anaerotruncus</i>              | 0.7033             | 0.0099         |
| <i>Bilophila</i>                    | <i>Bacteroides</i>                | 0.5469             | 0.0396         |
| <i>Bilophila</i>                    | <i>Bacteroides acidifaciens</i>   | -0.474             | 0.0396         |
| <i>Bilophila</i>                    | <i>rc4 4</i>                      | -0.4771            | 0.0099         |
|                                     | <i>Ruminococcus</i>               |                    |                |
| <i>Bilophila</i>                    | <i>(Lachnospiraceae)</i>          | 0.406              | 0.0396         |
| <i>Bilophila</i>                    | <i>Streptococcus</i>              | 0.4858             | 0.0198         |
| <i>Bilophila</i>                    | <i>Sutterella</i>                 | -0.5135            | 0.0099         |
| <i>Butyricicoccus pullicaecorum</i> | <i>Allobaculum</i>                | 0.6164             | 0.0099         |
| <i>Butyricicoccus pullicaecorum</i> | <i>Bacteroidales</i>              | 0.5549             | 0.0099         |
| <i>Butyricicoccus pullicaecorum</i> | <i>Bacteroides</i>                | -0.5548            | 0.0099         |
| <i>Butyricicoccus pullicaecorum</i> | <i>Bacteroides acidifaciens</i>   | 0.5836             | 0.0099         |
| <i>Butyricicoccus pullicaecorum</i> | <i>Christensenellaceae</i>        | -0.5198            | 0.0099         |
| <i>Butyricicoccus pullicaecorum</i> | <i>Clostridiales (II)</i>         | -0.7977            | 0.0198         |
| <i>Butyricicoccus pullicaecorum</i> | <i>Clostridium methylpentosum</i> | -0.633             | 0.0099         |
| <i>Butyricicoccus pullicaecorum</i> | <i>Dehalobacterium</i>            | -0.6866            | 0.0495         |
| <i>Butyricicoccus pullicaecorum</i> | <i>Mucispirillum schaedleri</i>   | -0.5751            | 0.0099         |
| <i>Butyricicoccus pullicaecorum</i> | <i>Muribaculaceae</i>             | 0.5862             | 0.0198         |

**Table S1.** Pairwise comparison of bacterial composition at phylum level across the diet groups

| <b>Taxon 1</b>                      | <b>Taxon 2</b>                      | <b>Correlation</b> | <b>p-value</b> |
|-------------------------------------|-------------------------------------|--------------------|----------------|
| <i>Butyricicoccus pullicaecorum</i> | <i>Oscillospira</i>                 | -0.62              | 0.0198         |
| <i>Butyricicoccus pullicaecorum</i> | <i>Parabacteroides gordonii</i>     | -0.4809            | 0.0198         |
| <i>Butyricicoccus pullicaecorum</i> | <i>Peptococcaceae</i>               | -0.5492            | 0.0099         |
| <i>Butyricicoccus pullicaecorum</i> | <i>rc4 4</i>                        | 0.436              | 0.0198         |
| <i>Butyricicoccus pullicaecorum</i> | <i>RF32</i>                         | 0.6163             | 0.0099         |
| <i>Butyricicoccus pullicaecorum</i> | <i>RF39</i>                         | 0.6112             | 0.0099         |
| <i>Butyricicoccus pullicaecorum</i> | <i>Rikenellaceae</i>                | 0.6001             | 0.0198         |
| <i>Butyricicoccus pullicaecorum</i> | <i>Ruminococcaceae (I)</i>          | -0.6007            | 0.0198         |
| <i>Butyricicoccus pullicaecorum</i> | <i>Ruminococcaceae (II)</i>         | -0.6147            | 0.0198         |
| <i>Butyricicoccus pullicaecorum</i> | <i>Ruminococcus gnavus</i>          | -0.6088            | 0.0099         |
| <i>Butyricicoccus pullicaecorum</i> | <i>Sutterella</i>                   | 0.653              | 0.0099         |
| <i>Christensenellaceae</i>          | <i>Allobaculum</i>                  | -0.6602            | 0.0099         |
| <i>Christensenellaceae</i>          | <i>Anaerotruncus</i>                | 0.695              | 0.0099         |
| <i>Christensenellaceae</i>          | <i>Bacteroides</i>                  | 0.6673             | 0.0099         |
| <i>Christensenellaceae</i>          | <i>Bacteroides acidifaciens</i>     | -0.4859            | 0.0099         |
| <i>Christensenellaceae</i>          | <i>Butyricicoccus pullicaecorum</i> | -0.5198            | 0.0099         |
| <i>Christensenellaceae</i>          | <i>Clostridium methylpentosum</i>   | 0.7227             | 0.0099         |
| <i>Christensenellaceae</i>          | <i>Coproccoccus</i>                 | 0.5055             | 0.0396         |
| <i>Christensenellaceae</i>          | <i>Dehalobacterium</i>              | 0.7359             | 0.0495         |
| <i>Christensenellaceae</i>          | <i>Dorea</i>                        | 0.4754             | 0.0099         |
| <i>Christensenellaceae</i>          | <i>Lactococcus</i>                  | 0.4332             | 0.0198         |
| <i>Christensenellaceae</i>          | <i>Mucispirillum schaedleri</i>     | 0.6366             | 0.0099         |
| <i>Christensenellaceae</i>          | <i>Oscillospira</i>                 | 0.7229             | 0.0198         |
| <i>Christensenellaceae</i>          | <i>Parabacteroides gordonii</i>     | 0.4699             | 0.0198         |

**Table S1.** Pairwise comparison of bacterial composition at phylum level across the diet groups

| <b>Taxon 1</b>                    | <b>Taxon 2</b>                      | <b>Correlation</b> | <b>p-value</b> |
|-----------------------------------|-------------------------------------|--------------------|----------------|
| <i>Christensenellaceae</i>        | <i>Peptococcaceae</i>               | 0.6144             | 0.0099         |
| <i>Christensenellaceae</i>        | <i>rc4 4</i>                        | -0.4383            | 0.0099         |
| <i>Christensenellaceae</i>        | <i>RF32</i>                         | -0.5837            | 0.0099         |
| <i>Christensenellaceae</i>        | <i>Rikenellaceae</i>                | -0.6868            | 0.0099         |
| <i>Christensenellaceae</i>        | <i>Ruminococcaceae (II)</i>         | 0.5596             | 0.0297         |
| <i>Christensenellaceae</i>        | <i>Ruminococcus gnavus</i>          | 0.6767             | 0.0099         |
| <i>Christensenellaceae</i>        | <i>Streptococcus</i>                | 0.4039             | 0.0099         |
| <i>Christensenellaceae</i>        | <i>Sutterella</i>                   | -0.6203            | 0.0099         |
| <i>Clostridiales (I)</i>          | <i>Bacteroides acidifaciens</i>     | -0.5447            | 0.0495         |
| <i>Clostridiales (I)</i>          | <i>Sutterella</i>                   | -0.4444            | 0.0495         |
| <i>Clostridiales (II)</i>         | <i>Allobaculum</i>                  | -0.6417            | 0.0198         |
| <i>Clostridiales (II)</i>         | <i>Anaerotruncus</i>                | 0.6543             | 0.0297         |
| <i>Clostridiales (II)</i>         | <i>Bacteroidales</i>                | -0.6171            | 0.0396         |
| <i>Clostridiales (II)</i>         | <i>Bacteroides acidifaciens</i>     | 1                  | 0.0297         |
| <i>Clostridiales (II)</i>         | <i>Butyricicoccus pullicaecorum</i> | -0.7977            | 0.0198         |
| <i>Clostridiales (II)</i>         | <i>Mucispirillum schaedleri</i>     | 0.6475             | 0.0396         |
| <i>Clostridiales (II)</i>         | <i>rc4 4</i>                        | -0.6854            | 0.0198         |
| <i>Clostridiales (II)</i>         | <i>RF32</i>                         | -0.6371            | 0.0297         |
| <i>Clostridiales (II)</i>         | <i>RF39</i>                         | -0.6351            | 0.0198         |
| <i>Clostridiales (II)</i>         | <i>Rikenellaceae</i>                | -0.7392            | 0.0396         |
| <i>Clostridiales (II)</i>         | <i>Streptococcus</i>                | 0.6597             | 0.0198         |
| <i>Clostridiales (II)</i>         | <i>Sutterella</i>                   | -0.8571            | 0.0198         |
| <i>Clostridium colinum</i>        | <i>Roseburia</i>                    | 0.7085             | 0.0099         |
| <i>Clostridium hathewayi</i>      | <i>Desulfovibrionaceae</i>          | 0.5141             | 0.0099         |
| <i>Clostridium hathewayi</i>      | <i>Muribaculaceae</i>               | -0.5008            | 0.0198         |
| <i>Clostridium (I)</i>            | <i>Muribaculaceae</i>               | -0.442             | 0.0198         |
| <i>Clostridium (II)</i>           | <i>Dorea</i>                        | -0.4974            | 0.0099         |
|                                   | <i>Ruminococcus</i>                 |                    |                |
| <i>Clostridium (II)</i>           | <i>(Ruminococcaceae)</i>            | 0.6413             | 0.0099         |
| <i>Clostridium methylpentosum</i> | <i>Allobaculum</i>                  | -0.665             | 0.0099         |
| <i>Clostridium methylpentosum</i> | <i>Anaerotruncus</i>                | 0.6913             | 0.0099         |
| <i>Clostridium methylpentosum</i> | <i>Bacteroides</i>                  | 0.5067             | 0.0099         |
| <i>Clostridium methylpentosum</i> | <i>Bacteroides acidifaciens</i>     | -0.6347            | 0.0099         |
| <i>Clostridium methylpentosum</i> | <i>Butyricicoccus pullicaecorum</i> | -0.633             | 0.0099         |

**Table S1.** Pairwise comparison of bacterial composition at phylum level across the diet groups

| <b>Taxon 1</b>                    | <b>Taxon 2</b>                      | <b>Correlation</b> | <b>p-value</b> |
|-----------------------------------|-------------------------------------|--------------------|----------------|
| <i>Clostridium methylpentosum</i> | <i>Christensenellaceae</i>          | 0.7227             | 0.0099         |
| <i>Clostridium methylpentosum</i> | <i>Desulfovibrionaceae</i>          | 0.4204             | 0.0099         |
| <i>Clostridium methylpentosum</i> | <i>Lactococcus</i>                  | 0.4939             | 0.0198         |
| <i>Clostridium methylpentosum</i> | <i>Mucispirillum schaedleri</i>     | 0.5571             | 0.0099         |
| <i>Clostridium methylpentosum</i> | <i>Muribaculaceae</i>               | -0.5136            | 0.0495         |
| <i>Clostridium methylpentosum</i> | <i>Oscillospira</i>                 | 0.6992             | 0.0099         |
| <i>Clostridium methylpentosum</i> | <i>Parabacteroides gordonii</i>     | 0.5318             | 0.0495         |
| <i>Clostridium methylpentosum</i> | <i>Peptococcaceae</i>               | 0.573              | 0.0297         |
| <i>Clostridium methylpentosum</i> | <i>rc4 4</i>                        | -0.4652            | 0.0099         |
| <i>Clostridium methylpentosum</i> | <i>RF32</i>                         | -0.5764            | 0.0099         |
| <i>Clostridium methylpentosum</i> | <i>RF39</i>                         | -0.4129            | 0.0495         |
| <i>Clostridium methylpentosum</i> | <i>Rikenellaceae</i>                | -0.7087            | 0.0099         |
| <i>Clostridium methylpentosum</i> | <i>Ruminococcaceae (II)</i>         | 0.5615             | 0.0396         |
| <i>Clostridium methylpentosum</i> | <i>Ruminococcus gnavus</i>          | 0.6431             | 0.0099         |
| <i>Clostridium methylpentosum</i> | <i>Streptococcus</i>                | 0.5758             | 0.0099         |
| <i>Clostridium methylpentosum</i> | <i>Sutterella</i>                   | -0.6956            | 0.0099         |
| <i>Coprococcus</i>                | <i>Allobaculum</i>                  | -0.6128            | 0.0099         |
| <i>Coprococcus</i>                | <i>Christensenellaceae</i>          | 0.5055             | 0.0396         |
| <i>Coprococcus</i>                | <i>Desulfovibrionaceae</i>          | 0.6027             | 0.0198         |
| <i>Coprococcus</i>                | <i>Dorea</i>                        | 0.4412             | 0.0297         |
| <i>Coprococcus</i>                | <i>Mucispirillum schaedleri</i>     | 0.5846             | 0.0297         |
| <i>Coprococcus</i>                | <i>Rikenellaceae</i>                | -0.4904            | 0.0495         |
|                                   | <i>Ruminococcus</i>                 |                    |                |
| <i>Coprococcus</i>                | <i>(Lachnospiraceae)</i>            | 0.4657             | 0.0396         |
| <i>Coprococcus</i>                | <i>Sutterella</i>                   | -0.5118            | 0.0198         |
| <i>Dehalobacterium</i>            | <i>Butyricicoccus pullicaecorum</i> | -0.6866            | 0.0495         |
| <i>Dehalobacterium</i>            | <i>Christensenellaceae</i>          | 0.7359             | 0.0495         |
| <i>Dehalobacterium</i>            | <i>Streptococcus</i>                | 0.6254             | 0.0495         |
| <i>Desulfovibrionaceae</i>        | <i>Allobaculum</i>                  | -0.5851            | 0.0099         |
| <i>Desulfovibrionaceae</i>        | <i>Bacteroides acidifaciens</i>     | -0.4005            | 0.0099         |
| <i>Desulfovibrionaceae</i>        | <i>Clostridium hathewayi</i>        | 0.5141             | 0.0099         |
| <i>Desulfovibrionaceae</i>        | <i>Clostridium methylpentosum</i>   | 0.4204             | 0.0099         |
| <i>Desulfovibrionaceae</i>        | <i>Coprococcus</i>                  | 0.6027             | 0.0198         |
| <i>Desulfovibrionaceae</i>        | <i>Mucispirillum schaedleri</i>     | 0.524              | 0.0099         |

**Table S1.** Pairwise comparison of bacterial composition at phylum level across the diet groups

| <b>Taxon 1</b>              | <b>Taxon 2</b>                  | <b>Correlation</b> | <b>p-value</b> |
|-----------------------------|---------------------------------|--------------------|----------------|
| <i>Desulfovibrionaceae</i>  | <i>Oscillospira</i>             | 0.5906             | 0.0297         |
| <i>Desulfovibrionaceae</i>  | RF39                            | -0.4195            | 0.0297         |
| <i>Desulfovibrionaceae</i>  | <i>Rikenellaceae</i>            | -0.4792            | 0.0099         |
| <i>Desulfovibrionaceae</i>  | <i>Ruminococcaceae</i> (I)      | 0.8177             | 0.0198         |
| <i>Desulfovibrionaceae</i>  | <i>Ruminococcaceae</i> (II)     | 0.5364             | 0.0198         |
| <i>Desulfovibrionaceae</i>  | <i>Ruminococcus gnavus</i>      | 0.4909             | 0.0198         |
| <i>Dorea</i>                | <i>Christensenellaceae</i>      | 0.4754             | 0.0099         |
| <i>Dorea</i>                | <i>Clostridium</i> (II)         | -0.4974            | 0.0099         |
| <i>Dorea</i>                | <i>Coproccoccus</i>             | 0.4412             | 0.0297         |
| <i>Dorea</i>                | <i>Mucispirillum schaedleri</i> | 0.5073             | 0.0099         |
| <i>Dorea</i>                | <i>Oscillospira</i>             | 0.4715             | 0.0495         |
| <i>Dorea</i>                | <i>Peptococcaceae</i>           | 0.5028             | 0.0297         |
| <i>Dorea</i>                | RF32                            | -0.4313            | 0.0099         |
| <i>Dorea</i>                | <i>Rikenellaceae</i>            | -0.4171            | 0.0198         |
| <i>Dorea</i>                | <i>Ruminococcus gnavus</i>      | 0.4663             | 0.0396         |
| <i>Dorea</i>                | <i>Sutterella</i>               | -0.4438            | 0.0297         |
| <i>Enterobacteriaceae</i>   | <i>Ruminococcaceae</i> (II)     | 0.4495             | 0.0099         |
|                             | <i>Ruminococcus</i>             |                    |                |
| <i>Enterobacteriaceae</i>   | ( <i>Ruminococcaceae</i> )      | 0.447              | 0.0198         |
| <i>Erysipelotrichaceae</i>  | <i>Lachnospiraceae</i> (II)     | -0.5727            | 0.0495         |
| <i>Erysipelotrichaceae</i>  | <i>Ruminococcaceae</i> (I)      | -0.5415            | 0.0396         |
| F16                         | <i>Akkermansia muciniphila</i>  | -0.5229            | 0.0099         |
| F16                         | <i>Bacteroides acidifaciens</i> | -0.5527            | 0.0099         |
| F16                         | <i>Lactobacillus</i>            | -0.4591            | 0.0099         |
| F16                         | <i>Muribaculaceae</i>           | -0.501             | 0.0099         |
| <i>Lachnospiraceae</i> (I)  | <i>Bacteroides acidifaciens</i> | -0.6692            | 0.0297         |
| <i>Lachnospiraceae</i> (I)  | rc4 4                           | -0.5018            | 0.0099         |
| <i>Lachnospiraceae</i> (II) | <i>Erysipelotrichaceae</i>      | -0.5727            | 0.0495         |
| <i>Lachnospiraceae</i> (II) | rc4 4                           | -0.5261            | 0.0396         |
|                             | <i>Ruminococcus</i>             |                    |                |
| <i>Lachnospiraceae</i> (II) | ( <i>Lachnospiraceae</i> )      | 0.5788             | 0.0099         |
| <i>Lactobacillus</i>        | <i>Allobaculum</i>              | 0.5286             | 0.0198         |
| <i>Lactobacillus</i>        | F16                             | -0.4591            | 0.0099         |
| <i>Lactobacillus</i>        | <i>Oscillospira</i>             | -0.6672            | 0.0198         |

**Table S1.** Pairwise comparison of bacterial composition at phylum level across the diet groups

| <b>Taxon 1</b>                  | <b>Taxon 2</b>                    | <b>Correlation</b> | <b>p-value</b> |
|---------------------------------|-----------------------------------|--------------------|----------------|
| <i>Lactobacillus</i>            | <i>Ruminococcus gnavus</i>        | -0.5506            | 0.0297         |
|                                 | <i>Ruminococcus</i>               |                    |                |
| <i>Lactobacillus</i>            | ( <i>Ruminococcaceae</i> )        | -0.6606            | 0.0198         |
| <i>Lactobacillus</i>            | <i>Sutterella</i>                 | 0.4253             | 0.0396         |
| <i>Lactococcus</i>              | <i>Anaerotruncus</i>              | 0.4505             | 0.0198         |
| <i>Lactococcus</i>              | <i>Bacteroidales</i>              | -0.4184            | 0.0099         |
| <i>Lactococcus</i>              | <i>Bacteroides</i>                | 0.4501             | 0.0297         |
| <i>Lactococcus</i>              | <i>Bacteroides acidifaciens</i>   | -0.6788            | 0.0099         |
| <i>Lactococcus</i>              | <i>Christensenellaceae</i>        | 0.4332             | 0.0198         |
| <i>Lactococcus</i>              | <i>Clostridium methylpentosum</i> | 0.4939             | 0.0198         |
| <i>Lactococcus</i>              | <i>Mucispirillum schaedleri</i>   | 0.5349             | 0.0099         |
| <i>Lactococcus</i>              | <i>Muribaculaceae</i>             | -0.6427            | 0.0198         |
| <i>Lactococcus</i>              | rc4 4                             | -0.4528            | 0.0099         |
| <i>Lactococcus</i>              | RF32                              | -0.5218            | 0.0099         |
| <i>Lactococcus</i>              | <i>Rikenellaceae</i>              | -0.5777            | 0.0099         |
| <i>Lactococcus</i>              | <i>Ruminococcus gnavus</i>        | 0.4753             | 0.0099         |
| <i>Lactococcus</i>              | <i>Streptococcus</i>              | 0.4863             | 0.0099         |
| <i>Lactococcus</i>              | <i>Sutterella</i>                 | -0.5508            | 0.0099         |
| <i>Mogibacteriaceae</i> (I)     | <i>Adlercreutzia</i>              | -0.4819            | 0.0099         |
| <i>Mogibacteriaceae</i> (II)    | <i>Allobaculum</i>                | 0.4387             | 0.0198         |
| <i>Mogibacteriaceae</i> (II)    | <i>Bacteroides</i>                | -0.4732            | 0.0396         |
| <i>Mogibacteriaceae</i> (II)    | <i>Bacteroides acidifaciens</i>   | 0.7584             | 0.0099         |
| <i>Mogibacteriaceae</i> (II)    | <i>Muribaculaceae</i>             | 0.6559             | 0.0099         |
| <i>Mogibacteriaceae</i> (II)    | rc4 4                             | 0.5009             | 0.0099         |
| <i>Mogibacteriaceae</i> (II)    | RF32                              | 0.4702             | 0.0099         |
| <i>Mogibacteriaceae</i> (II)    | <i>Rikenellaceae</i>              | 0.5896             | 0.0297         |
| <i>Mogibacteriaceae</i> (II)    | <i>Ruminococcus gnavus</i>        | -0.4378            | 0.0198         |
| <i>Mogibacteriaceae</i> (II)    | <i>Sutterella</i>                 | 0.5853             | 0.0099         |
| <i>Mucispirillum schaedleri</i> | <i>Allobaculum</i>                | -0.6859            | 0.0099         |
| <i>Mucispirillum schaedleri</i> | <i>Anaerotruncus</i>              | 0.6487             | 0.0099         |
| <i>Mucispirillum schaedleri</i> | <i>Bacteroidales</i>              | -0.5242            | 0.0099         |
| <i>Mucispirillum schaedleri</i> | <i>Bacteroides</i>                | 0.626              | 0.0099         |
| <i>Mucispirillum schaedleri</i> | <i>Bacteroides acidifaciens</i>   | -0.6543            | 0.0099         |
| <i>Mucispirillum schaedleri</i> | <i>Butyricoccus pullicaecorum</i> | -0.5751            | 0.0099         |

**Table S1.** Pairwise comparison of bacterial composition at phylum level across the diet groups

| <b>Taxon 1</b>                  | <b>Taxon 2</b>                      | <b>Correlation</b> | <b>p-value</b> |
|---------------------------------|-------------------------------------|--------------------|----------------|
| <i>Mucispirillum schaedleri</i> | <i>Christensenellaceae</i>          | 0.6366             | 0.0099         |
| <i>Mucispirillum schaedleri</i> | <i>Clostridiales (II)</i>           | 0.6475             | 0.0396         |
| <i>Mucispirillum schaedleri</i> | <i>Clostridium methylpentosum</i>   | 0.5571             | 0.0099         |
| <i>Mucispirillum schaedleri</i> | <i>Coprococcus</i>                  | 0.5846             | 0.0297         |
| <i>Mucispirillum schaedleri</i> | <i>Desulfovibrionaceae</i>          | 0.524              | 0.0099         |
| <i>Mucispirillum schaedleri</i> | <i>Dorea</i>                        | 0.5073             | 0.0099         |
| <i>Mucispirillum schaedleri</i> | <i>Lactococcus</i>                  | 0.5349             | 0.0099         |
| <i>Mucispirillum schaedleri</i> | <i>Muribaculaceae</i>               | -0.5718            | 0.0495         |
| <i>Mucispirillum schaedleri</i> | <i>Oscillospira</i>                 | 0.775              | 0.0099         |
| <i>Mucispirillum schaedleri</i> | <i>Parabacteroides gordonii</i>     | 0.4165             | 0.0396         |
| <i>Mucispirillum schaedleri</i> | <i>Peptococcaceae</i>               | 0.6764             | 0.0198         |
| <i>Mucispirillum schaedleri</i> | <i>rc4 4</i>                        | -0.504             | 0.0297         |
| <i>Mucispirillum schaedleri</i> | <i>RF32</i>                         | -0.5706            | 0.0099         |
| <i>Mucispirillum schaedleri</i> | <i>RF39</i>                         | -0.4558            | 0.0297         |
| <i>Mucispirillum schaedleri</i> | <i>Rikenellaceae</i>                | -0.624             | 0.0099         |
| <i>Mucispirillum schaedleri</i> | <i>Ruminococcaceae (I)</i>          | 0.7894             | 0.0495         |
| <i>Mucispirillum schaedleri</i> | <i>Ruminococcus gnavus</i>          | 0.7156             | 0.0099         |
| <i>Mucispirillum schaedleri</i> | <i>Streptococcus</i>                | 0.4798             | 0.0099         |
| <i>Mucispirillum schaedleri</i> | <i>Sutterella</i>                   | -0.749             | 0.0099         |
| <i>Muribaculaceae</i>           | <i>Adlercreutzia</i>                | -0.4097            | 0.0297         |
| <i>Muribaculaceae</i>           | <i>Allobaculum</i>                  | 0.6225             | 0.0198         |
| <i>Muribaculaceae</i>           | <i>Bacteroidales</i>                | 0.7358             | 0.0099         |
| <i>Muribaculaceae</i>           | <i>Bacteroides acidifaciens</i>     | 0.7002             | 0.0297         |
| <i>Muribaculaceae</i>           | <i>Butyricicoccus pullicaecorum</i> | 0.5862             | 0.0198         |
| <i>Muribaculaceae</i>           | <i>Clostridium hathewayi</i>        | -0.5008            | 0.0198         |
| <i>Muribaculaceae</i>           | <i>Clostridium (I)</i>              | -0.442             | 0.0198         |
| <i>Muribaculaceae</i>           | <i>Clostridium methylpentosum</i>   | -0.5136            | 0.0495         |
| <i>Muribaculaceae</i>           | <i>F16</i>                          | -0.501             | 0.0099         |
| <i>Muribaculaceae</i>           | <i>Lactococcus</i>                  | -0.6427            | 0.0198         |
| <i>Muribaculaceae</i>           | <i>Mogibacteriaceae (II)</i>        | 0.6559             | 0.0099         |
| <i>Muribaculaceae</i>           | <i>Mucispirillum schaedleri</i>     | -0.5718            | 0.0495         |
| <i>Muribaculaceae</i>           | <i>rc4 4</i>                        | 0.6779             | 0.0198         |
| <i>Muribaculaceae</i>           | <i>RF32</i>                         | 0.7999             | 0.0099         |
| <i>Muribaculaceae</i>           | <i>Rikenellaceae</i>                | 0.6916             | 0.0297         |

**Table S1.** Pairwise comparison of bacterial composition at phylum level across the diet groups

| <b>Taxon 1</b>                  | <b>Taxon 2</b>                      | <b>Correlation</b> | <b>p-value</b> |
|---------------------------------|-------------------------------------|--------------------|----------------|
| <i>Muribaculaceae</i>           | <i>Ruminococcus gnavus</i>          | -0.7735            | 0.0099         |
| <i>Muribaculaceae</i>           | <i>Sutterella</i>                   | 0.8523             | 0.0099         |
| <i>Oscillospira</i>             | <i>Allobaculum</i>                  | -0.8149            | 0.0099         |
| <i>Oscillospira</i>             | <i>Anaerotruncus</i>                | 0.7022             | 0.0099         |
| <i>Oscillospira</i>             | <i>Bacteroides</i>                  | 0.7179             | 0.0297         |
| <i>Oscillospira</i>             | <i>Bacteroides acidifaciens</i>     | -0.6911            | 0.0297         |
| <i>Oscillospira</i>             | <i>Butyricicoccus pullicaecorum</i> | -0.62              | 0.0198         |
| <i>Oscillospira</i>             | <i>Christensenellaceae</i>          | 0.7229             | 0.0198         |
| <i>Oscillospira</i>             | <i>Clostridium methylpentosum</i>   | 0.6992             | 0.0099         |
| <i>Oscillospira</i>             | <i>Desulfovibrionaceae</i>          | 0.5906             | 0.0297         |
| <i>Oscillospira</i>             | <i>Dorea</i>                        | 0.4715             | 0.0495         |
| <i>Oscillospira</i>             | <i>Lactobacillus</i>                | -0.6672            | 0.0198         |
| <i>Oscillospira</i>             | <i>Mucispirillum schaedleri</i>     | 0.775              | 0.0099         |
| <i>Oscillospira</i>             | <i>Peptococcaceae</i>               | 0.7573             | 0.0495         |
| <i>Oscillospira</i>             | <i>rc4 4</i>                        | -0.7207            | 0.0198         |
| <i>Oscillospira</i>             | <i>RF32</i>                         | -0.5912            | 0.0099         |
| <i>Oscillospira</i>             | <i>RF39</i>                         | -0.6057            | 0.0297         |
| <i>Oscillospira</i>             | <i>Rikenellaceae</i>                | -0.7144            | 0.0198         |
| <i>Oscillospira</i>             | <i>Ruminococcus gnavus</i>          | 0.8118             | 0.0198         |
| <i>Oscillospira</i>             | <i>Streptococcus</i>                | 0.6218             | 0.0198         |
| <i>Oscillospira</i>             | <i>Sutterella</i>                   | -0.845             | 0.0099         |
| <i>Parabacteroides gordonii</i> | <i>Anaerotruncus</i>                | 0.5829             | 0.0198         |
| <i>Parabacteroides gordonii</i> | <i>Butyricicoccus pullicaecorum</i> | -0.4809            | 0.0198         |
| <i>Parabacteroides gordonii</i> | <i>Christensenellaceae</i>          | 0.4699             | 0.0198         |
| <i>Parabacteroides gordonii</i> | <i>Clostridium methylpentosum</i>   | 0.5318             | 0.0495         |
| <i>Parabacteroides gordonii</i> | <i>Mucispirillum schaedleri</i>     | 0.4165             | 0.0396         |
| <i>Peptococcaceae</i>           | <i>Allobaculum</i>                  | -0.6891            | 0.0099         |
| <i>Peptococcaceae</i>           | <i>Anaerotruncus</i>                | 0.7029             | 0.0099         |
| <i>Peptococcaceae</i>           | <i>Bacteroides</i>                  | 0.7086             | 0.0297         |
| <i>Peptococcaceae</i>           | <i>Bacteroides acidifaciens</i>     | -0.7333            | 0.0099         |
| <i>Peptococcaceae</i>           | <i>Butyricicoccus pullicaecorum</i> | -0.5492            | 0.0099         |
| <i>Peptococcaceae</i>           | <i>Christensenellaceae</i>          | 0.6144             | 0.0099         |
| <i>Peptococcaceae</i>           | <i>Clostridium methylpentosum</i>   | 0.573              | 0.0297         |
| <i>Peptococcaceae</i>           | <i>Dorea</i>                        | 0.5028             | 0.0297         |

**Table S1.** Pairwise comparison of bacterial composition at phylum level across the diet groups

| <b>Taxon 1</b>        | <b>Taxon 2</b>                      | <b>Correlation</b> | <b>p-value</b> |
|-----------------------|-------------------------------------|--------------------|----------------|
| <i>Peptococcaceae</i> | <i>Mucispirillum schaedleri</i>     | 0.6764             | 0.0198         |
| <i>Peptococcaceae</i> | <i>Oscillospira</i>                 | 0.7573             | 0.0495         |
| <i>Peptococcaceae</i> | <i>rc4 4</i>                        | -0.716             | 0.0099         |
| <i>Peptococcaceae</i> | RF32                                | -0.6533            | 0.0099         |
| <i>Peptococcaceae</i> | <i>Rikenellaceae</i>                | -0.6968            | 0.0198         |
| <i>Peptococcaceae</i> | <i>Ruminococcus gnavus</i>          | 0.7785             | 0.0099         |
|                       | <i>Ruminococcus</i>                 |                    |                |
| <i>Peptococcaceae</i> | ( <i>Lachnospiraceae</i> )          | 0.4304             | 0.0495         |
| <i>Peptococcaceae</i> | <i>Streptococcus</i>                | 0.6544             | 0.0099         |
| <i>Peptococcaceae</i> | <i>Sutterella</i>                   | -0.6967            | 0.0198         |
| <i>rc4 4</i>          | <i>Akkermansia muciniphila</i>      | 0.4385             | 0.0198         |
| <i>rc4 4</i>          | <i>Allobaculum</i>                  | 0.6133             | 0.0099         |
| <i>rc4 4</i>          | <i>Anaerotruncus</i>                | -0.4664            | 0.0099         |
| <i>rc4 4</i>          | <i>Bacteroidales</i>                | 0.472              | 0.0099         |
| <i>rc4 4</i>          | <i>Bacteroides</i>                  | -0.7371            | 0.0198         |
| <i>rc4 4</i>          | <i>Bacteroides acidifaciens</i>     | 0.802              | 0.0099         |
| <i>rc4 4</i>          | <i>Bilophila</i>                    | -0.4771            | 0.0099         |
| <i>rc4 4</i>          | <i>Butyricicoccus pullicaecorum</i> | 0.436              | 0.0198         |
| <i>rc4 4</i>          | <i>Christensenellaceae</i>          | -0.4383            | 0.0099         |
| <i>rc4 4</i>          | <i>Clostridiales</i> (II)           | -0.6854            | 0.0198         |
| <i>rc4 4</i>          | <i>Clostridium methylpentosum</i>   | -0.4652            | 0.0099         |
| <i>rc4 4</i>          | <i>Lachnospiraceae</i> (I)          | -0.5018            | 0.0099         |
| <i>rc4 4</i>          | <i>Lachnospiraceae</i> (II)         | -0.5261            | 0.0396         |
| <i>rc4 4</i>          | <i>Lactococcus</i>                  | -0.4528            | 0.0099         |
| <i>rc4 4</i>          | <i>Mogibacteriaceae</i> (II)        | 0.5009             | 0.0099         |
| <i>rc4 4</i>          | <i>Mucispirillum schaedleri</i>     | -0.504             | 0.0297         |
| <i>rc4 4</i>          | <i>Muribaculaceae</i>               | 0.6779             | 0.0198         |
| <i>rc4 4</i>          | <i>Oscillospira</i>                 | -0.7207            | 0.0198         |
| <i>rc4 4</i>          | <i>Peptococcaceae</i>               | -0.716             | 0.0099         |
| <i>rc4 4</i>          | RF32                                | 0.7551             | 0.0099         |
| <i>rc4 4</i>          | <i>Rikenellaceae</i>                | 0.6339             | 0.0099         |
| <i>rc4 4</i>          | <i>Ruminococcaceae</i> (I)          | -0.5975            | 0.0396         |
| <i>rc4 4</i>          | <i>Ruminococcus gnavus</i>          | -0.6217            | 0.0099         |
| <i>rc4 4</i>          | <i>Streptococcus</i>                | -0.489             | 0.0099         |

**Table S1.** Pairwise comparison of bacterial composition at phylum level across the diet groups

| <b>Taxon 1</b>       | <b>Taxon 2</b>                      | <b>Correlation</b> | <b>p-value</b> |
|----------------------|-------------------------------------|--------------------|----------------|
| <i>rc4 4</i>         | <i>Sutterella</i>                   | 0.7031             | 0.0099         |
| <i>RF32</i>          | <i>Allobaculum</i>                  | 0.5875             | 0.0099         |
| <i>RF32</i>          | <i>Anaerotruncus</i>                | -0.5394            | 0.0099         |
| <i>RF32</i>          | <i>Bacteroidales</i>                | 0.5945             | 0.0099         |
| <i>RF32</i>          | <i>Bacteroides</i>                  | -0.5772            | 0.0198         |
| <i>RF32</i>          | <i>Bacteroides acidifaciens</i>     | 0.9205             | 0.0099         |
| <i>RF32</i>          | <i>Butyricicoccus pullicaecorum</i> | 0.6163             | 0.0099         |
| <i>RF32</i>          | <i>Christensenellaceae</i>          | -0.5837            | 0.0099         |
| <i>RF32</i>          | <i>Clostridiales (II)</i>           | -0.6371            | 0.0297         |
| <i>RF32</i>          | <i>Clostridium methylpentosum</i>   | -0.5764            | 0.0099         |
| <i>RF32</i>          | <i>Dorea</i>                        | -0.4313            | 0.0099         |
| <i>RF32</i>          | <i>Lactococcus</i>                  | -0.5218            | 0.0099         |
| <i>RF32</i>          | <i>Mogibacteriaceae (II)</i>        | 0.4702             | 0.0099         |
| <i>RF32</i>          | <i>Mucispirillum schaedleri</i>     | -0.5706            | 0.0099         |
| <i>RF32</i>          | <i>Muribaculaceae</i>               | 0.7999             | 0.0099         |
| <i>RF32</i>          | <i>Oscillospira</i>                 | -0.5912            | 0.0099         |
| <i>RF32</i>          | <i>Peptococcaceae</i>               | -0.6533            | 0.0099         |
| <i>RF32</i>          | <i>rc4 4</i>                        | 0.7551             | 0.0099         |
| <i>RF32</i>          | <i>Rikenellaceae</i>                | 0.862              | 0.0099         |
| <i>RF32</i>          | <i>Ruminococcus gnavus</i>          | -0.588             | 0.0099         |
| <i>RF32</i>          | <i>Streptococcus</i>                | -0.6317            | 0.0099         |
| <i>RF32</i>          | <i>Sutterella</i>                   | 0.7779             | 0.0099         |
| <i>RF39</i>          | <i>Allobaculum</i>                  | 0.4504             | 0.0099         |
| <i>RF39</i>          | <i>Butyricicoccus pullicaecorum</i> | 0.6112             | 0.0099         |
| <i>RF39</i>          | <i>Clostridiales (II)</i>           | -0.6351            | 0.0198         |
| <i>RF39</i>          | <i>Clostridium methylpentosum</i>   | -0.4129            | 0.0495         |
| <i>RF39</i>          | <i>Desulfovibrionaceae</i>          | -0.4195            | 0.0297         |
| <i>RF39</i>          | <i>Mucispirillum schaedleri</i>     | -0.4558            | 0.0297         |
| <i>RF39</i>          | <i>Oscillospira</i>                 | -0.6057            | 0.0297         |
| <i>RF39</i>          | <i>Ruminococcaceae (I)</i>          | 1                  | 0.0297         |
| <i>RF39</i>          | <i>Ruminococcus gnavus</i>          | -0.4498            | 0.0099         |
| <i>Rikenellaceae</i> | <i>Allobaculum</i>                  | 0.7471             | 0.0099         |
| <i>Rikenellaceae</i> | <i>Anaerotruncus</i>                | -0.5739            | 0.0396         |
| <i>Rikenellaceae</i> | <i>Bacteroidales</i>                | 0.5491             | 0.0099         |

**Table S1.** Pairwise comparison of bacterial composition at phylum level across the diet groups

| <b>Taxon 1</b>             | <b>Taxon 2</b>                      | <b>Correlation</b> | <b>p-value</b> |
|----------------------------|-------------------------------------|--------------------|----------------|
| <i>Rikenellaceae</i>       | <i>Bacteroides</i>                  | -0.6628            | 0.0099         |
| <i>Rikenellaceae</i>       | <i>Bacteroides acidifaciens</i>     | 0.8036             | 0.0099         |
| <i>Rikenellaceae</i>       | <i>Butyricicoccus pullicaecorum</i> | 0.6001             | 0.0198         |
| <i>Rikenellaceae</i>       | <i>Christensenellaceae</i>          | -0.6868            | 0.0099         |
| <i>Rikenellaceae</i>       | <i>Clostridiales (II)</i>           | -0.7392            | 0.0396         |
| <i>Rikenellaceae</i>       | <i>Clostridium methylpentosum</i>   | -0.7087            | 0.0099         |
| <i>Rikenellaceae</i>       | <i>Coprococcus</i>                  | -0.4904            | 0.0495         |
| <i>Rikenellaceae</i>       | <i>Desulfovibrionaceae</i>          | -0.4792            | 0.0099         |
| <i>Rikenellaceae</i>       | <i>Dorea</i>                        | -0.4171            | 0.0198         |
| <i>Rikenellaceae</i>       | <i>Lactococcus</i>                  | -0.5777            | 0.0099         |
| <i>Rikenellaceae</i>       | <i>Mogibacteriaceae (II)</i>        | 0.5896             | 0.0297         |
| <i>Rikenellaceae</i>       | <i>Mucispirillum schaedleri</i>     | -0.624             | 0.0099         |
| <i>Rikenellaceae</i>       | <i>Muribaculaceae</i>               | 0.6916             | 0.0297         |
| <i>Rikenellaceae</i>       | <i>Oscillospira</i>                 | -0.7144            | 0.0198         |
| <i>Rikenellaceae</i>       | <i>Peptococcaceae</i>               | -0.6968            | 0.0198         |
| <i>Rikenellaceae</i>       | <i>rc4 4</i>                        | 0.6339             | 0.0099         |
| <i>Rikenellaceae</i>       | <i>RF32</i>                         | 0.862              | 0.0099         |
| <i>Rikenellaceae</i>       | <i>Ruminococcaceae (I)</i>          | -0.729             | 0.0396         |
| <i>Rikenellaceae</i>       | <i>Ruminococcaceae (II)</i>         | -0.7436            | 0.0396         |
| <i>Rikenellaceae</i>       | <i>Ruminococcus gnavus</i>          | -0.784             | 0.0099         |
| <i>Rikenellaceae</i>       | <i>Streptococcus</i>                | -0.4309            | 0.0495         |
| <i>Rikenellaceae</i>       | <i>Sutterella</i>                   | 0.7562             | 0.0099         |
| <i>Roseburia</i>           | <i>Clostridium colinum</i>          | 0.7085             | 0.0099         |
| <i>Ruminococcaceae (I)</i> | <i>Allobaculum</i>                  | -0.7728            | 0.0198         |
| <i>Ruminococcaceae (I)</i> | <i>Anaerotruncus</i>                | 0.5555             | 0.0396         |
| <i>Ruminococcaceae (I)</i> | <i>Butyricicoccus pullicaecorum</i> | -0.6007            | 0.0198         |
| <i>Ruminococcaceae (I)</i> | <i>Desulfovibrionaceae</i>          | 0.8177             | 0.0198         |
| <i>Ruminococcaceae (I)</i> | <i>Erysipelotrichaceae</i>          | -0.5415            | 0.0396         |
| <i>Ruminococcaceae (I)</i> | <i>Mucispirillum schaedleri</i>     | 0.7894             | 0.0495         |
| <i>Ruminococcaceae (I)</i> | <i>rc4 4</i>                        | -0.5975            | 0.0396         |
| <i>Ruminococcaceae (I)</i> | <i>RF39</i>                         | 1                  | 0.0297         |
| <i>Ruminococcaceae (I)</i> | <i>Rikenellaceae</i>                | -0.729             | 0.0396         |
|                            | <i>Ruminococcus</i>                 |                    |                |
| <i>Ruminococcaceae (I)</i> | <i>(Lachnospiraceae)</i>            | 0.4986             | 0.0396         |

**Table S1.** Pairwise comparison of bacterial composition at phylum level across the diet groups

| <b>Taxon 1</b>              | <b>Taxon 2</b>                      | <b>Correlation</b> | <b>p-value</b> |
|-----------------------------|-------------------------------------|--------------------|----------------|
| <i>Ruminococcaceae</i> (I)  | <i>Streptococcus</i>                | 0.6585             | 0.0297         |
| <i>Ruminococcaceae</i> (I)  | <i>Sutterella</i>                   | -0.6546            | 0.0396         |
| <i>Ruminococcaceae</i> (II) | <i>Allobaculum</i>                  | -0.6007            | 0.0297         |
| <i>Ruminococcaceae</i> (II) | <i>Anaerotruncus</i>                | 0.6048             | 0.0297         |
| <i>Ruminococcaceae</i> (II) | <i>Butyricicoccus pullicaecorum</i> | -0.6147            | 0.0198         |
| <i>Ruminococcaceae</i> (II) | <i>Christensenellaceae</i>          | 0.5596             | 0.0297         |
| <i>Ruminococcaceae</i> (II) | <i>Clostridium methylpentosum</i>   | 0.5615             | 0.0396         |
| <i>Ruminococcaceae</i> (II) | <i>Desulfovibrionaceae</i>          | 0.5364             | 0.0198         |
| <i>Ruminococcaceae</i> (II) | <i>Enterobacteriaceae</i>           | 0.4495             | 0.0099         |
| <i>Ruminococcaceae</i> (II) | <i>Rikenellaceae</i>                | -0.7436            | 0.0396         |
| <i>Ruminococcaceae</i> (II) | <i>Sutterella</i>                   | -0.5098            | 0.0495         |
| <i>Ruminococcus gnavus</i>  | <i>Allobaculum</i>                  | -0.7664            | 0.0099         |
| <i>Ruminococcus gnavus</i>  | <i>Anaerotruncus</i>                | 0.6821             | 0.0099         |
| <i>Ruminococcus gnavus</i>  | <i>Bacteroides</i>                  | 0.737              | 0.0099         |
| <i>Ruminococcus gnavus</i>  | <i>Bacteroides acidifaciens</i>     | -0.7898            | 0.0198         |
| <i>Ruminococcus gnavus</i>  | <i>Butyricicoccus pullicaecorum</i> | -0.6088            | 0.0099         |
| <i>Ruminococcus gnavus</i>  | <i>Christensenellaceae</i>          | 0.6767             | 0.0099         |
| <i>Ruminococcus gnavus</i>  | <i>Clostridium methylpentosum</i>   | 0.6431             | 0.0099         |
| <i>Ruminococcus gnavus</i>  | <i>Desulfovibrionaceae</i>          | 0.4909             | 0.0198         |
| <i>Ruminococcus gnavus</i>  | <i>Dorea</i>                        | 0.4663             | 0.0396         |
| <i>Ruminococcus gnavus</i>  | <i>Lactobacillus</i>                | -0.5506            | 0.0297         |
| <i>Ruminococcus gnavus</i>  | <i>Lactococcus</i>                  | 0.4753             | 0.0099         |
| <i>Ruminococcus gnavus</i>  | <i>Mogibacteriaceae</i> (II)        | -0.4378            | 0.0198         |
| <i>Ruminococcus gnavus</i>  | <i>Mucispirillum schaedleri</i>     | 0.7156             | 0.0099         |
| <i>Ruminococcus gnavus</i>  | <i>Muribaculaceae</i>               | -0.7735            | 0.0099         |
| <i>Ruminococcus gnavus</i>  | <i>Oscillospira</i>                 | 0.8118             | 0.0198         |
| <i>Ruminococcus gnavus</i>  | <i>Peptococcaceae</i>               | 0.7785             | 0.0099         |
| <i>Ruminococcus gnavus</i>  | <i>rc4 4</i>                        | -0.6217            | 0.0099         |
| <i>Ruminococcus gnavus</i>  | <i>RF32</i>                         | -0.588             | 0.0099         |
| <i>Ruminococcus gnavus</i>  | <i>RF39</i>                         | -0.4498            | 0.0099         |
| <i>Ruminococcus gnavus</i>  | <i>Rikenellaceae</i>                | -0.784             | 0.0099         |
| <i>Ruminococcus gnavus</i>  | <i>Streptococcus</i>                | 0.5417             | 0.0099         |
| <i>Ruminococcus gnavus</i>  | <i>Sutterella</i>                   | -0.7761            | 0.0099         |

**Table S1.** Pairwise comparison of bacterial composition at phylum level across the diet groups

| <b>Taxon 1</b>                                    | <b>Taxon 2</b>                    | <b>Correlation</b> | <b>p-value</b> |
|---------------------------------------------------|-----------------------------------|--------------------|----------------|
| <i>Ruminococcus</i><br>( <i>Lachnospiraceae</i> ) | <i>Bilophila</i>                  | 0.406              | 0.0396         |
| <i>Ruminococcus</i><br>( <i>Lachnospiraceae</i> ) | <i>Coprococcus</i>                | 0.4657             | 0.0396         |
| <i>Ruminococcus</i><br>( <i>Lachnospiraceae</i> ) | <i>Lachnospiraceae</i> (II)       | 0.5788             | 0.0099         |
| <i>Ruminococcus</i><br>( <i>Lachnospiraceae</i> ) | <i>Peptococcaceae</i>             | 0.4304             | 0.0495         |
| <i>Ruminococcus</i><br>( <i>Lachnospiraceae</i> ) | <i>Ruminococcaceae</i> (I)        | 0.4986             | 0.0396         |
| <i>Ruminococcus</i><br>( <i>Ruminococcaceae</i> ) | <i>Clostridium</i> (II)           | 0.6413             | 0.0099         |
| <i>Ruminococcus</i><br>( <i>Ruminococcaceae</i> ) | <i>Enterobacteriaceae</i>         | 0.447              | 0.0198         |
| <i>Ruminococcus</i><br>( <i>Ruminococcaceae</i> ) | <i>Lactobacillus</i>              | -0.6606            | 0.0198         |
| <i>Streptococcus</i>                              | <i>Anaerotruncus</i>              | 0.5456             | 0.0099         |
| <i>Streptococcus</i>                              | <i>Bacteroides</i>                | 0.4986             | 0.0198         |
| <i>Streptococcus</i>                              | <i>Bacteroides acidifaciens</i>   | -0.5349            | 0.0099         |
| <i>Streptococcus</i>                              | <i>Bilophila</i>                  | 0.4858             | 0.0198         |
| <i>Streptococcus</i>                              | <i>Christensenellaceae</i>        | 0.4039             | 0.0099         |
| <i>Streptococcus</i>                              | <i>Clostridiales</i> (II)         | 0.6597             | 0.0198         |
| <i>Streptococcus</i>                              | <i>Clostridium methylpentosum</i> | 0.5758             | 0.0099         |
| <i>Streptococcus</i>                              | <i>Dehalobacterium</i>            | 0.6254             | 0.0495         |
| <i>Streptococcus</i>                              | <i>Lactococcus</i>                | 0.4863             | 0.0099         |
| <i>Streptococcus</i>                              | <i>Mucispirillum schaedleri</i>   | 0.4798             | 0.0099         |
| <i>Streptococcus</i>                              | <i>Oscillospira</i>               | 0.6218             | 0.0198         |
| <i>Streptococcus</i>                              | <i>Peptococcaceae</i>             | 0.6544             | 0.0099         |
| <i>Streptococcus</i>                              | <i>rc4 4</i>                      | -0.489             | 0.0099         |
| <i>Streptococcus</i>                              | <i>RF32</i>                       | -0.6317            | 0.0099         |
| <i>Streptococcus</i>                              | <i>Rikenellaceae</i>              | -0.4309            | 0.0495         |
| <i>Streptococcus</i>                              | <i>Ruminococcaceae</i> (I)        | 0.6585             | 0.0297         |
| <i>Streptococcus</i>                              | <i>Ruminococcus gnavus</i>        | 0.5417             | 0.0099         |
| <i>Streptococcus</i>                              | <i>Sutterella</i>                 | -0.5752            | 0.0099         |
| <i>Sutterella</i>                                 | <i>Allobaculum</i>                | 0.7814             | 0.0099         |

**Table S1.** Pairwise comparison of bacterial composition at phylum level across the diet groups

| <b>Taxon 1</b>    | <b>Taxon 2</b>                      | <b>Correlation</b> | <b>p-value</b> |
|-------------------|-------------------------------------|--------------------|----------------|
| <i>Sutterella</i> | <i>Anaerotruncus</i>                | -0.622             | 0.0099         |
| <i>Sutterella</i> | <i>Bacteroidales</i>                | 0.6197             | 0.0099         |
| <i>Sutterella</i> | <i>Bacteroides</i>                  | -0.7186            | 0.0099         |
| <i>Sutterella</i> | <i>Bacteroides acidifaciens</i>     | 0.8574             | 0.0099         |
| <i>Sutterella</i> | <i>Bilophila</i>                    | -0.5135            | 0.0099         |
| <i>Sutterella</i> | <i>Butyricicoccus pullicaecorum</i> | 0.653              | 0.0099         |
| <i>Sutterella</i> | <i>Christensenellaceae</i>          | -0.6203            | 0.0099         |
| <i>Sutterella</i> | <i>Clostridiales (I)</i>            | -0.4444            | 0.0495         |
| <i>Sutterella</i> | <i>Clostridiales (II)</i>           | -0.8571            | 0.0198         |
| <i>Sutterella</i> | <i>Clostridium methylpentosum</i>   | -0.6956            | 0.0099         |
| <i>Sutterella</i> | <i>Coprococcus</i>                  | -0.5118            | 0.0198         |
| <i>Sutterella</i> | <i>Dorea</i>                        | -0.4438            | 0.0297         |
| <i>Sutterella</i> | <i>Lactobacillus</i>                | 0.4253             | 0.0396         |
| <i>Sutterella</i> | <i>Lactococcus</i>                  | -0.5508            | 0.0099         |
| <i>Sutterella</i> | <i>Mogibacteriaceae (II)</i>        | 0.5853             | 0.0099         |
| <i>Sutterella</i> | <i>Mucispirillum schaedleri</i>     | -0.749             | 0.0099         |
| <i>Sutterella</i> | <i>Muribaculaceae</i>               | 0.8523             | 0.0099         |
| <i>Sutterella</i> | <i>Oscillospira</i>                 | -0.845             | 0.0099         |
| <i>Sutterella</i> | <i>Peptococcaceae</i>               | -0.6967            | 0.0198         |
| <i>Sutterella</i> | <i>rc4 4</i>                        | 0.7031             | 0.0099         |
| <i>Sutterella</i> | <i>RF32</i>                         | 0.7779             | 0.0099         |
| <i>Sutterella</i> | <i>Rikenellaceae</i>                | 0.7562             | 0.0099         |
| <i>Sutterella</i> | <i>Ruminococcaceae (I)</i>          | -0.6546            | 0.0396         |
| <i>Sutterella</i> | <i>Ruminococcaceae (II)</i>         | -0.5098            | 0.0495         |
| <i>Sutterella</i> | <i>Ruminococcus gnavus</i>          | -0.7761            | 0.0099         |
| <i>Sutterella</i> | <i>Streptococcus</i>                | -0.5752            | 0.0099         |

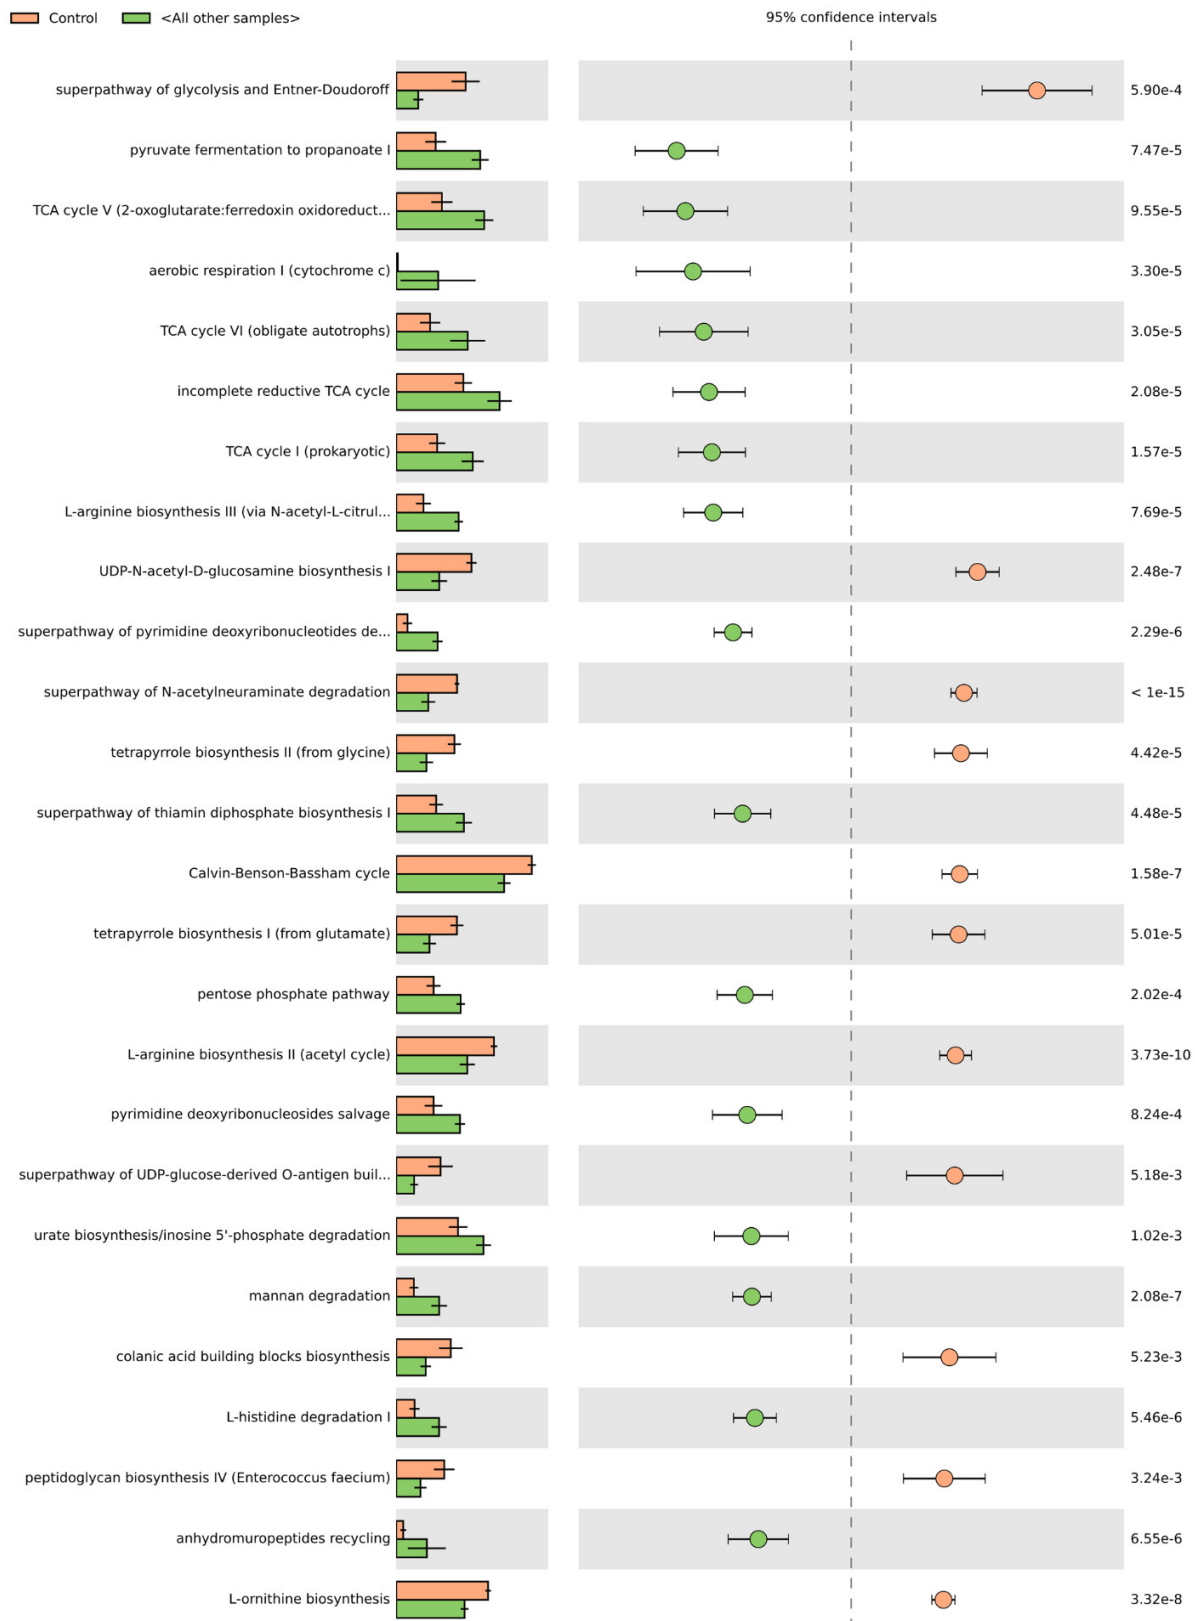

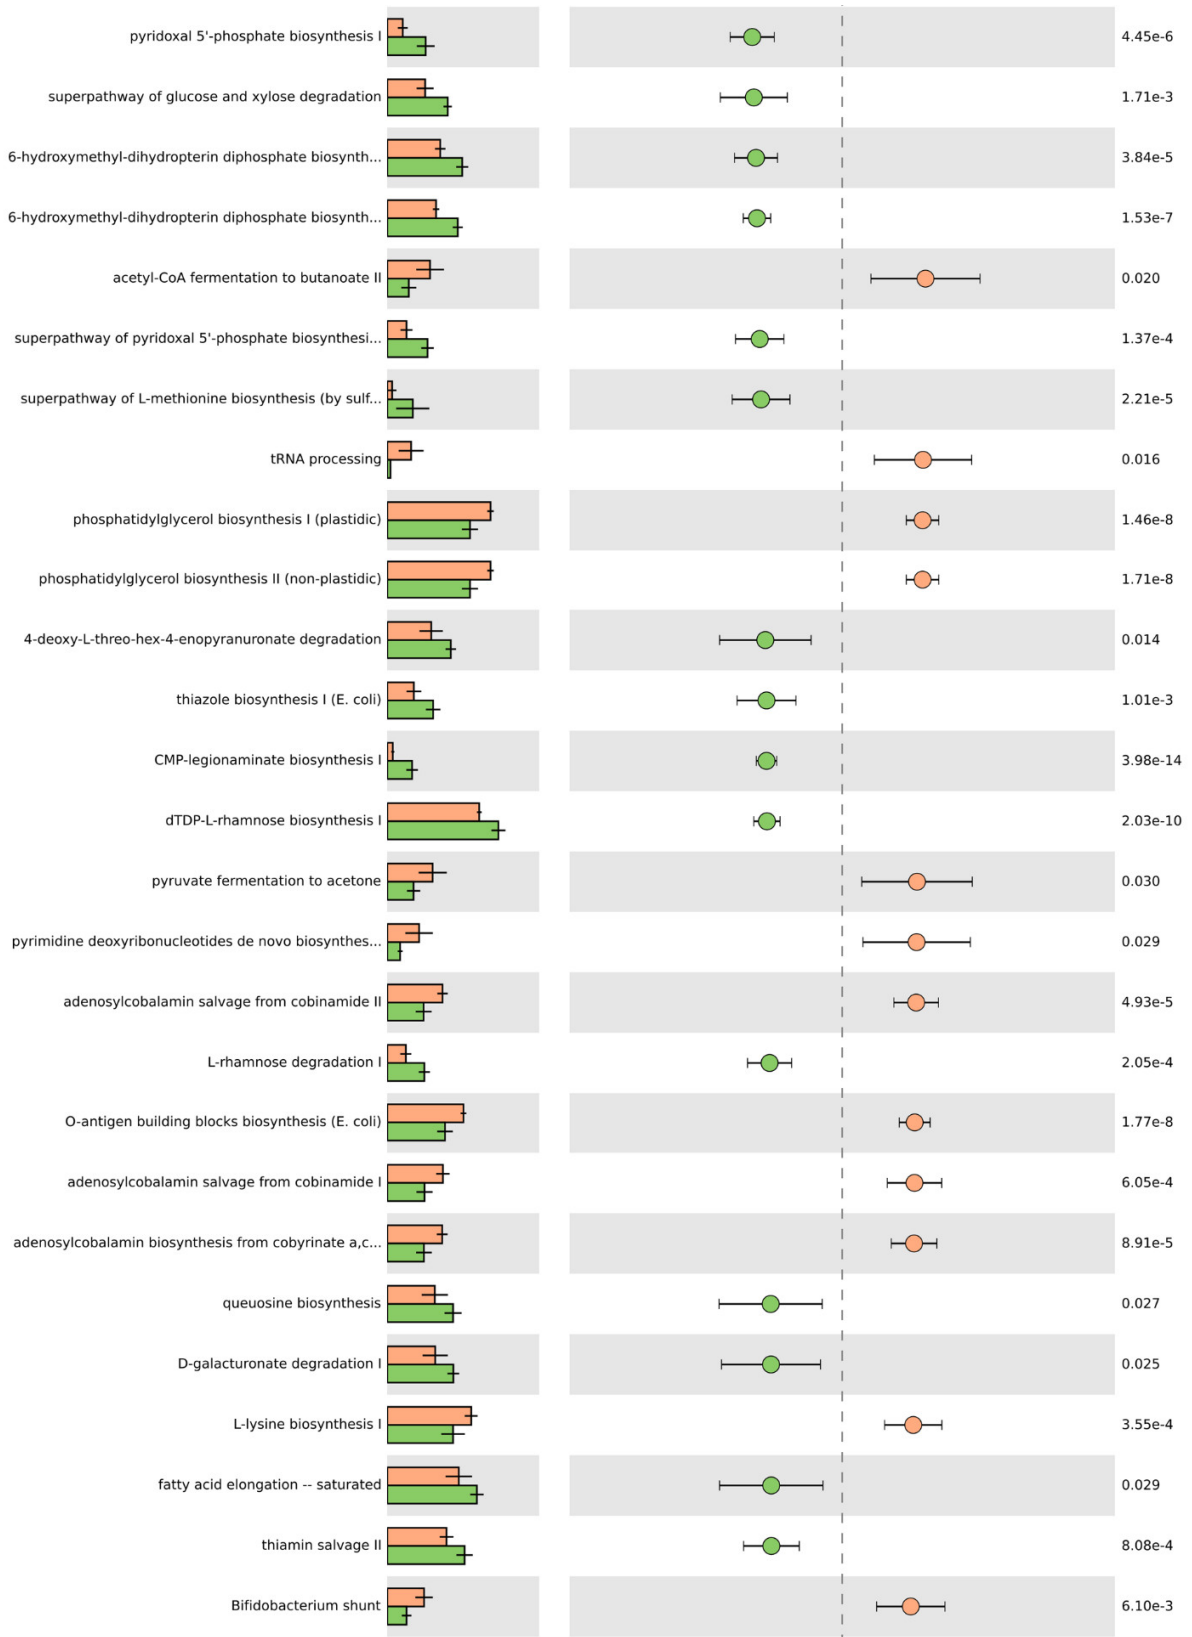

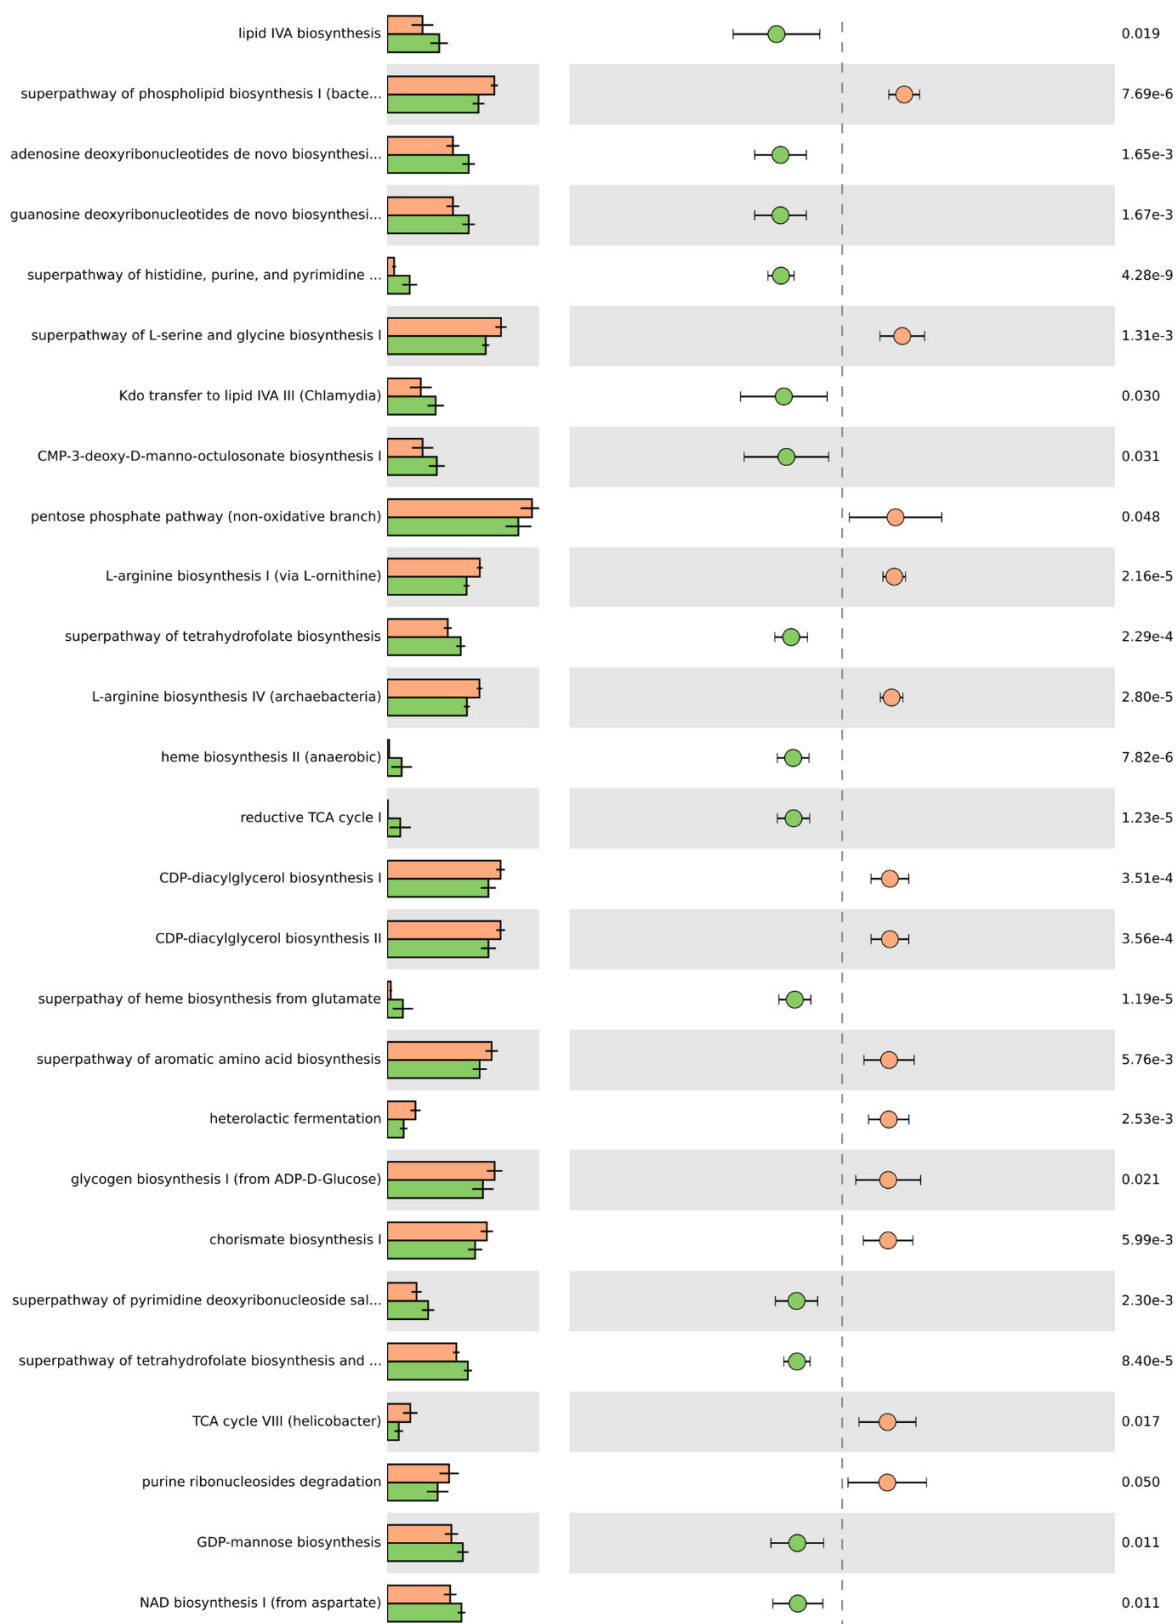

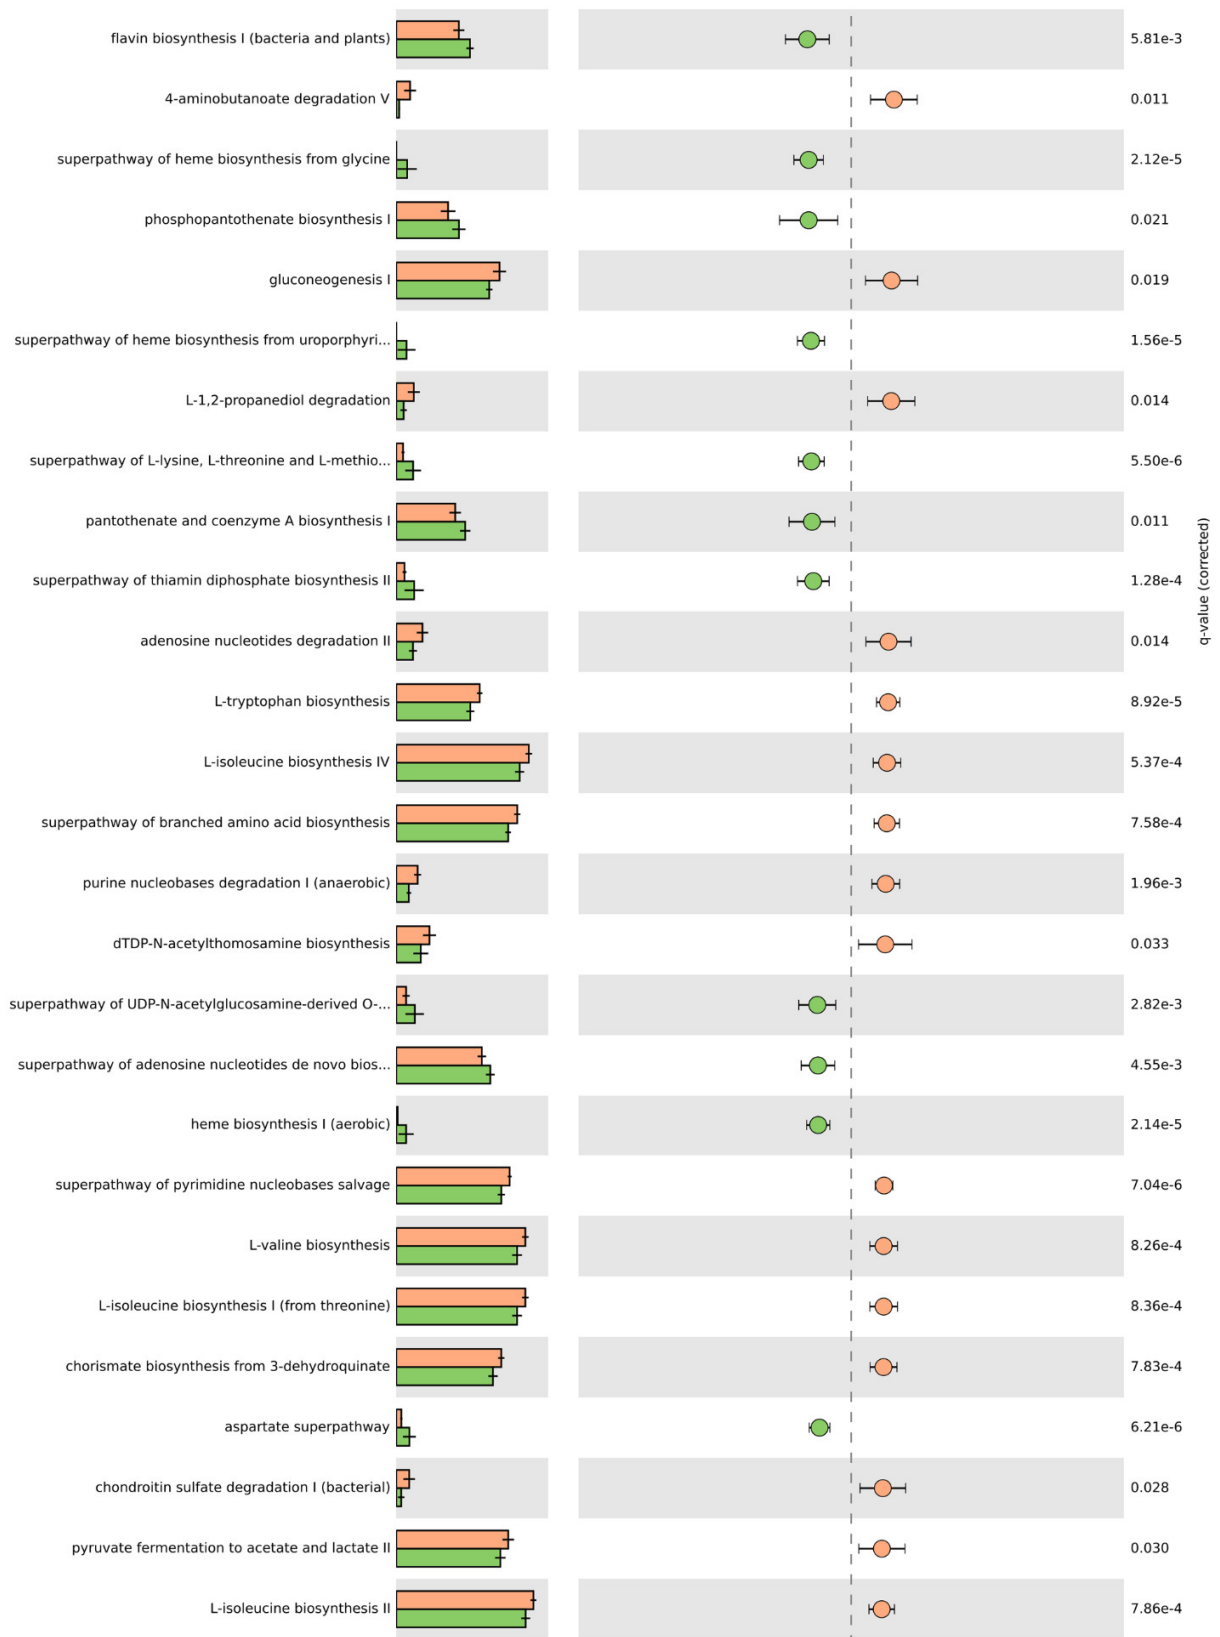

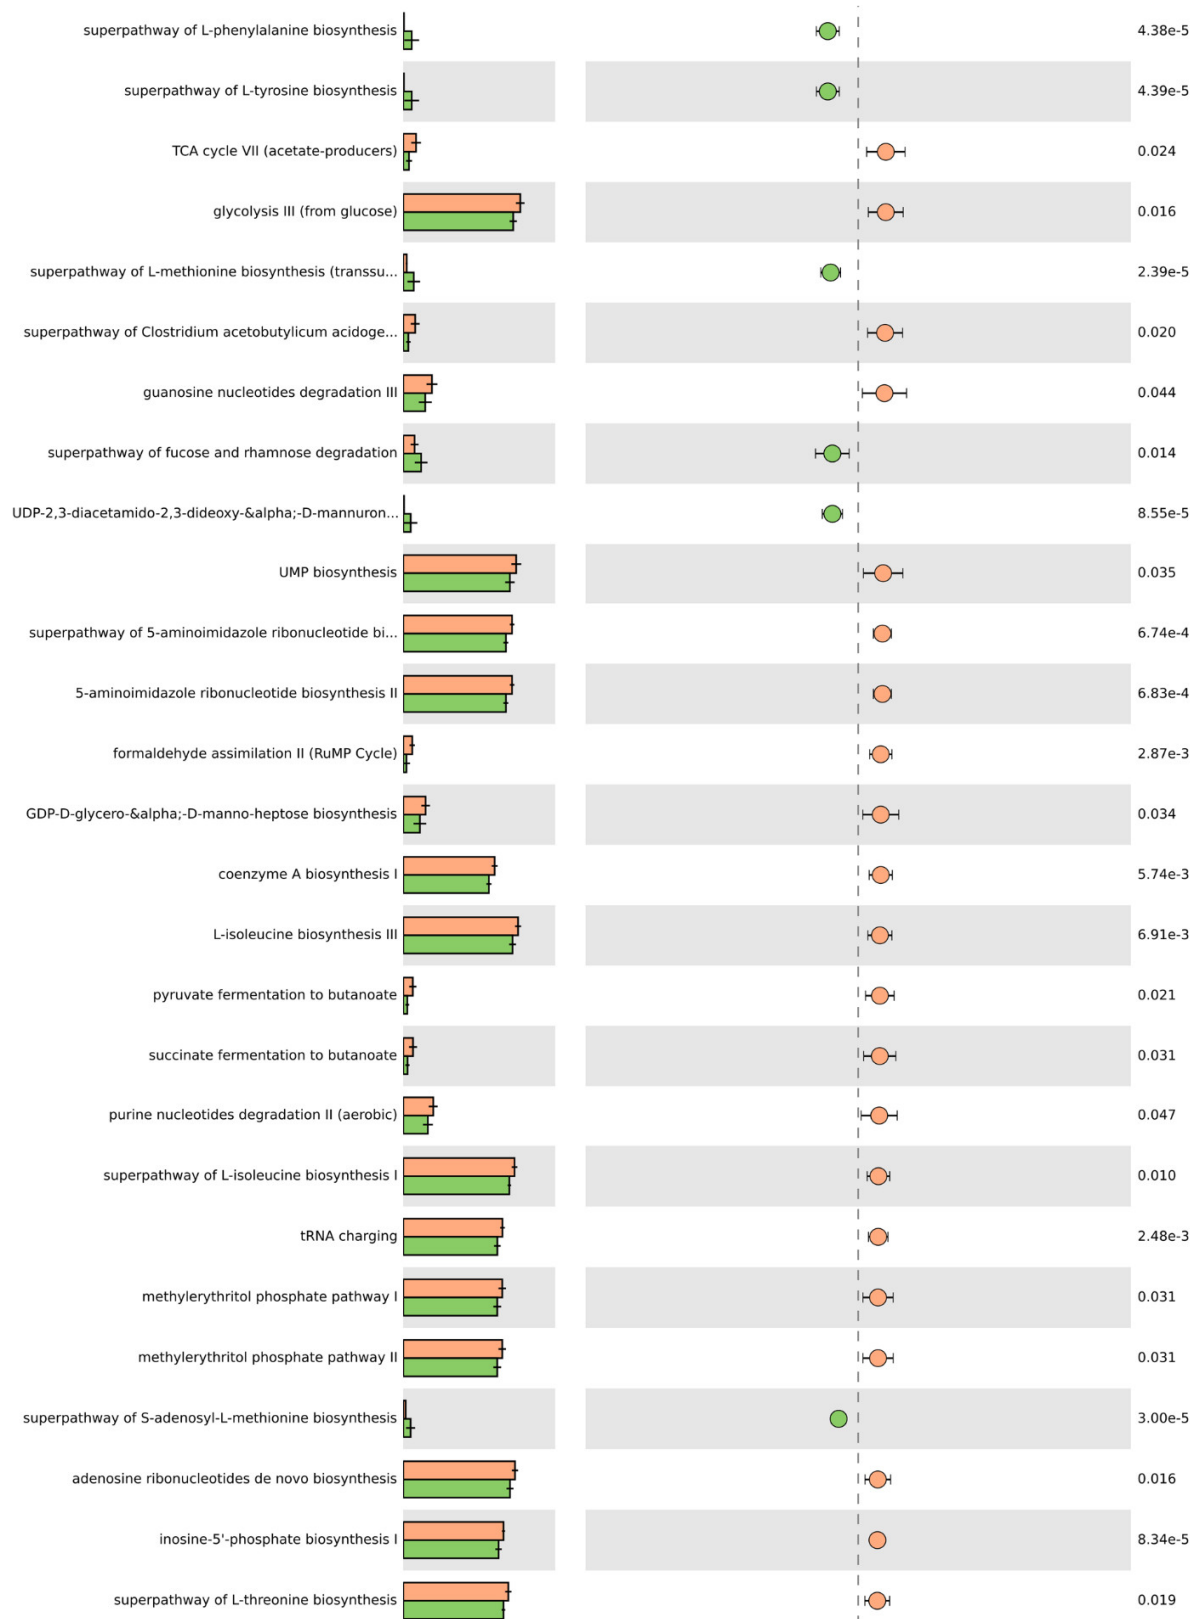

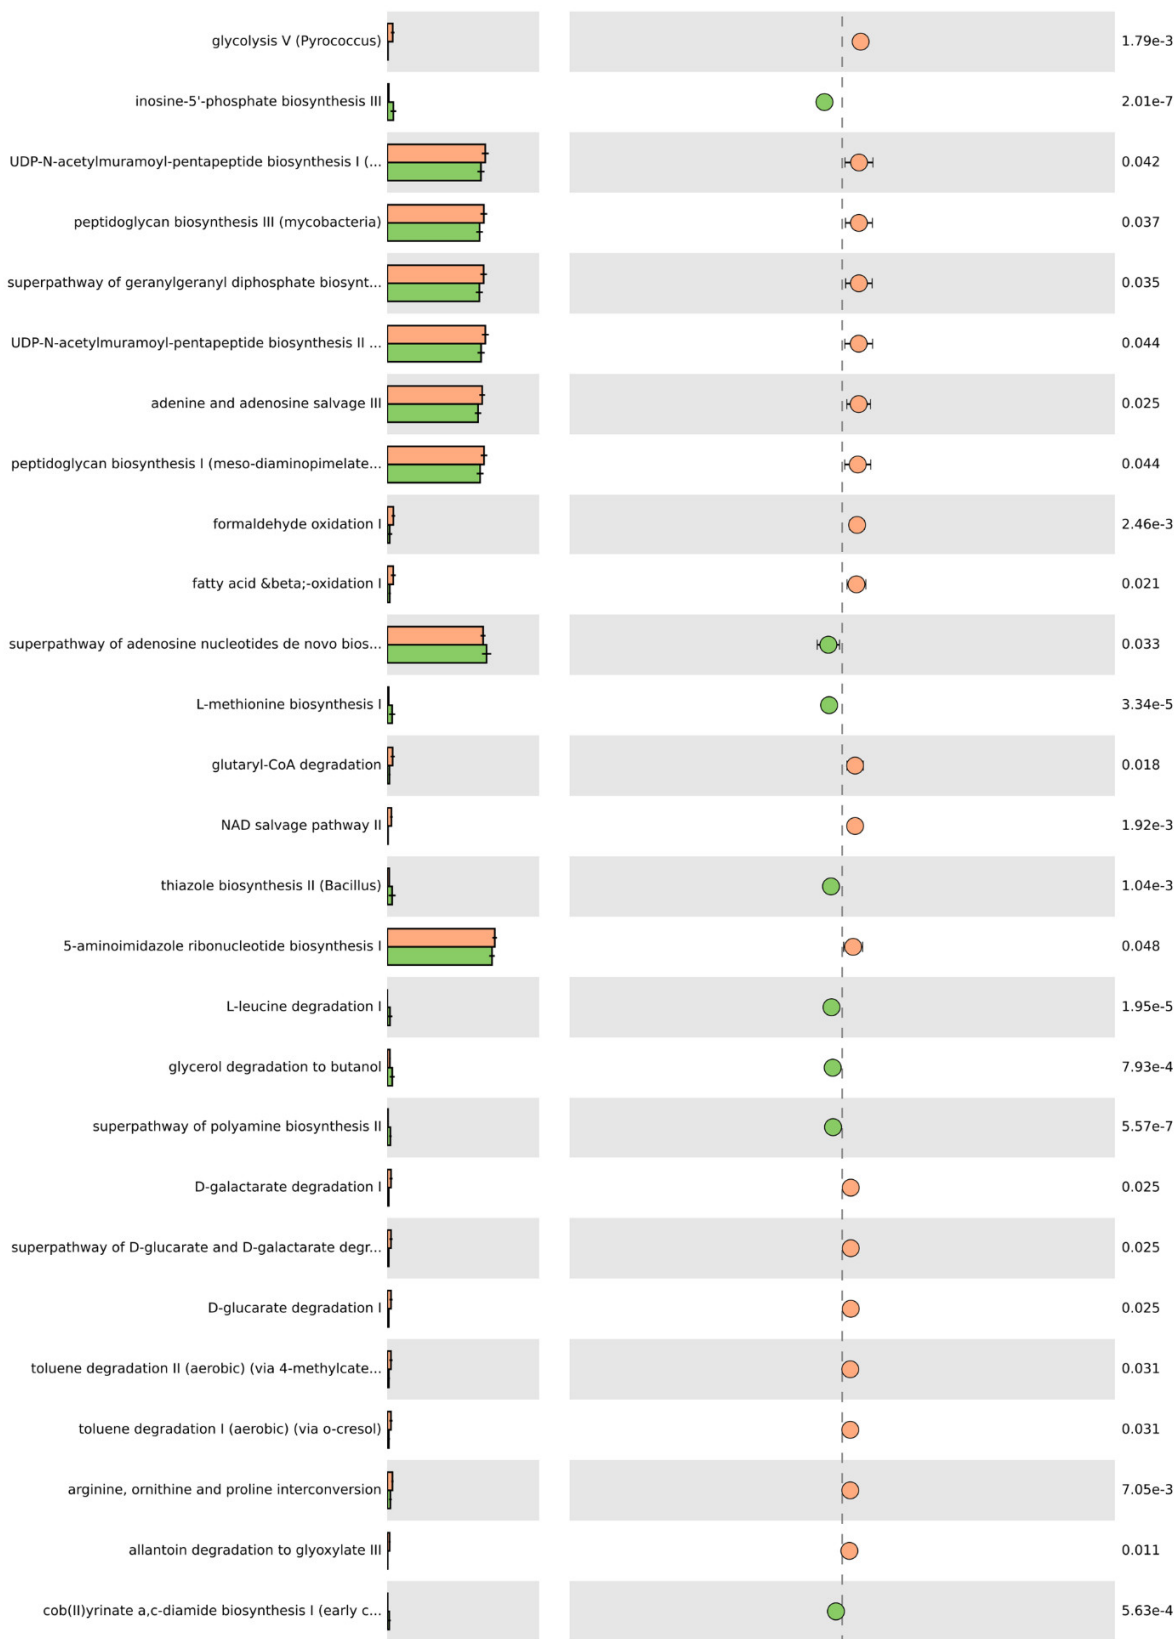

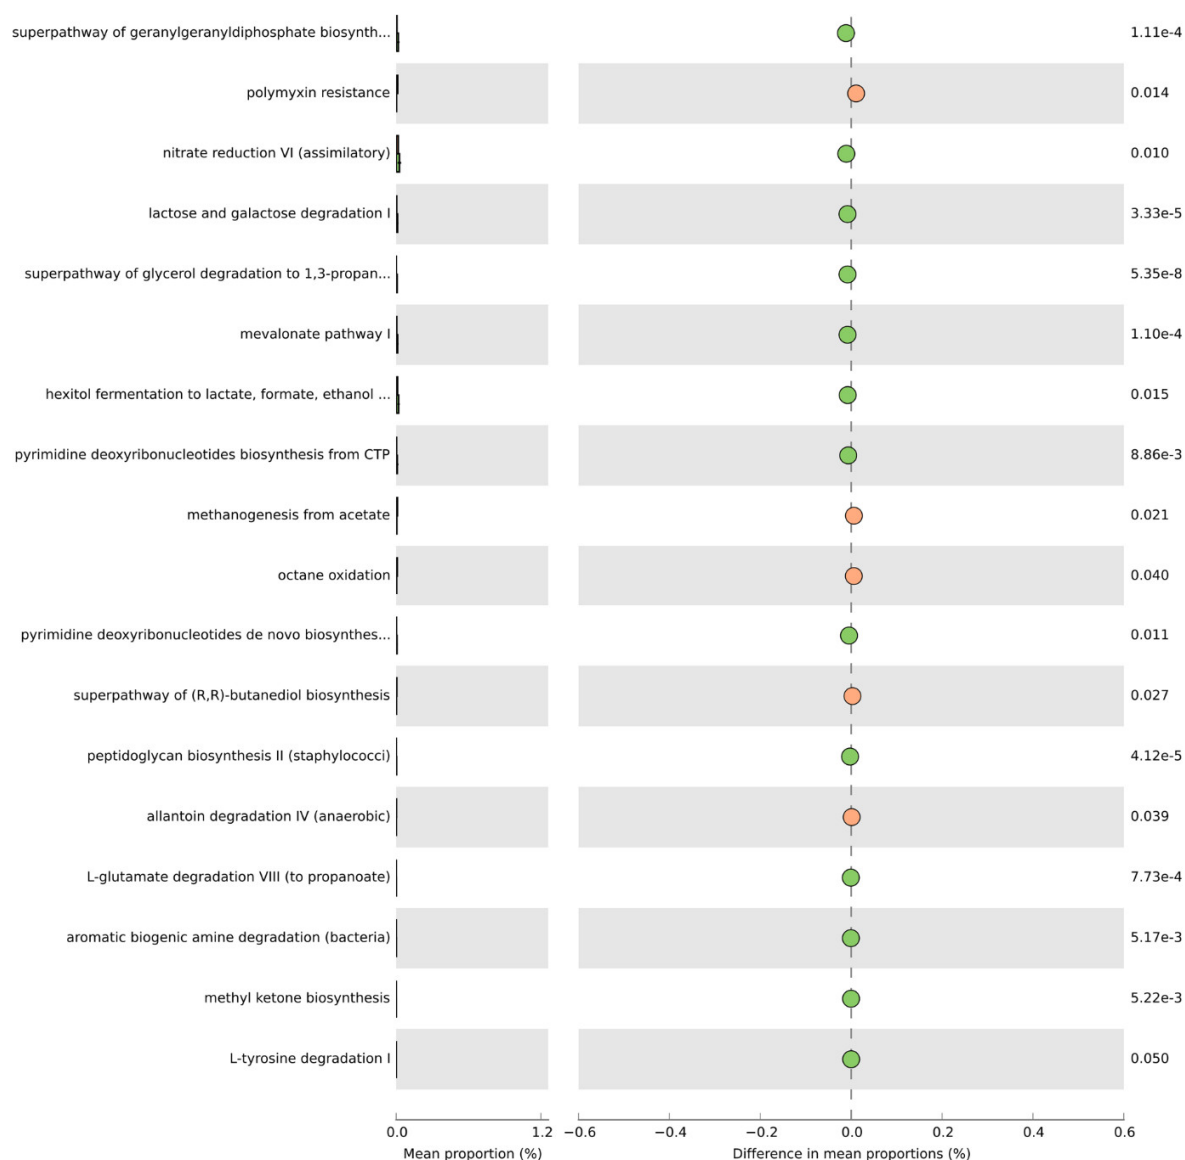

**Figure S1.** PICRUST2 results indicating differential pathways between the pulse-free and pulse-supplemented diet groups. 179 significant pathways are presented here in the Extended error bar plot indicating the mean proportion of pathways assigned to each group, difference between them, and corrected  $p$ -value ( $q$ -value) of each: pulse-free diet (*Control*) is indicated in beige, while pulse-based diet samples (*All other samples*)—in green:
